# Supplementary material
Source: PubMed Central journal article supplement (PMC3503164)
Supplement: 1204609109_sapp.pdf [file 1204609109_sapp.pdf]

**Metazoan opsin evolution reveals a simple route to animal vision**

*Roberto Feuda, Sinead C. Hamilton, James O. McInerney and Davide Pisani*

**Supplementary Online Materials**

## Supplementary Methods

**Data mining and data set assembly.** To identify homologues of sequences from GPCRdb in non-bilaterian metazoans we performed a series of blastP searches against the genomes of *Hydra magnipapillata*, *Nematostella vectensis* and *Trichoplax adherens*.

These searches were seeded using the sequences we obtained from GPCRdb. To further enrich our data set of putative opsin homologues from non-bilaterian metazoans, we used our set of opsins to seed a series of blastP searches against the genome of the placozoan *Trichoplax adherens*, and against a large set of predicted GPCRs from the two available sponge genomes (that of the demosponge *Amphimedon queenslandica*, and that of the homoscleromorph *Oscarella carmela*). This data mining step was performed according to the following protocol: (I) each sequence in GPCRdb (a total of 42110 sequences) was used to seed a TblastN search of every scaffold of both sponge genomes. (II) Gene predictions were performed for all positive hits using Augustus (1), trained against the *Amphimedon queenslandica* genome. (III) Predicted genes from both sponges (a total of 13059 *Oscarella* sequences and 23858 *Amphimedon* sequences) were merged into a database that also included the entire proteome of the placozoans *Trichoplax adherans*. (IV) A series of blastP searches seeded using our set of 449 well-characterised opsins (see above) was performed against this database. All sequences with an e-value  $\leq -20$  were retained as representing putative opsin homologues. This procedure identified several putative opsin homologues from *Trichoplax*, one putative opsin homologue from *Oscarella*, but no putative opsin homologue from *Amphimedon*. Accordingly (V) a final BlastP analysis of the *Amphimedon* sequences was performed using, as a seed, the putative opsin homologue we identified in *Oscarella*. The two best hits from this final blastP search (E-values =  $1e^{-08}$  and  $1e^{-07}$ ) were added to our data set.

The complete set of sequences we identified included 625 GPCRs from across Metazoa, including 499 opsins. This dataset was subsampled to generate the data sets we used in our phylogenetic analyses.

**Multiple sequence alignment and data set curation.** To build our two master multiple sequence alignment (AOM and G&OM) we used Prank (2) with the +F option. The two master alignments were visualized and manually edited using Jalview (3) to eliminate gap-rich regions, as well as regions of dubious alignment quality.

In contrast to classical multiple sequence alignment software, Prank can distinguish insertions from deletions and has been suggested to have the potential to generate more realistic alignments. Indeed, our previous investigations shown that using Prank's alignments in phylogenetic studies based on single gene alignments, results in the recovery of more accurate phylogenetic trees (4). This suggests that Prank's alignments efficiently capture the phylogenetic signal single gene alignments.

**Phylogenetic analyses.** We used RAxML 7.2.6 (5) to estimate dataset specific GTR-matrices for our data sets. We used the AIC test to rank the fit to our data sets of the available empirical GTR matrices (like WAG, JTT and MtRev) and of our dataset specific GTR matrices. We further evaluated the difference between our GTR matrices and alternative, pre-computed, empirical GTR matrices (WAG and MtRev) by comparing their absolute substitution rates, and graphically displaying, for each amino acid, the difference ( $\Delta$ -abs) between the GTR absolute substitution rate and the WAG or MtRev absolute substitution rate. In addition, we used 12-fold Bayesian Cross-validation as implemented in Phylobayes 3.2 (6), to evaluate whether any of the precomputed CAT-

based models (7) would fit our data sets significantly better than a dataset specific GTR matrix. We thus compared the site-heterogeneous C20 +  $\Gamma$ , C30 +  $\Gamma$ , C40 +  $\Gamma$ , C50 +  $\Gamma$ , C60 +  $\Gamma$ , UL3+  $\Gamma$ , WLSR5+  $\Gamma$  (7), against GTR +  $\Gamma$ . Because of computational limitations the 12-fold Bayesian cross validation was only performed for the O&GM and O&O data sets (see main text). Results of the cross validation analyses showed (Tab. S4) that none of the pre-computed CAT-based models fit our data better than a data set specific GTR matrix.

All our analyses were performed under dataset specific GTR +  $\Gamma$  models in Phylobayes 3.2. For all analyses, two independent runs were performed and convergence was monitored using the maxdiff statistics calculated using the bpcomp program (see the Phylobayes manual). Analyses were considered to have converged when maxdiff dropped below 0.3 (see the Phylobayes manual). Results of the analyses of the O&O data sets were further confirmed by performing Maximum Likelihood (ML) analyses (under LG +  $\Gamma$ ) in RAxML (5). Support for the nodes in the ML phylogeny were estimated using the bootstrap (108 replicates). ML analyses were performed under LG +  $\Gamma$ , rather than GTR +  $\Gamma$ , in order to test also the sensitivity of our results to the use of less fitting models.

Posterior Predictive analysis (PPA; implemented in Phylobayes3.2) was used to evaluate whether our data sets contained compositionally heterogeneous sequences and to evaluate whether compositional heterogeneity could have affected our results.

The Approximately Unbiased (AU) test (8), implemented using RAxML under GTR +  $\Gamma$ , was used to evaluate whether our data set (O&O data set – see main text) allowed to statistically discriminating between our results and those of previously

published studies (9-12).

We performed Bayesian (13) and ML-based ancestral character state reconstruction for the O&O data set and recovered the ancestral retinal-binding domain for two key, internal nodes. These nodes are the one identifying the last common ancestor of all the opsins (LOCA – see main text), and the one identifying the last common ancestor of all the eumetazoan opsins (LOCNA – see main text). Bayesian Ancestral character state reconstruction was performed using MrBayes3.2 (14) under the dataset specific GTR substitution matrix we derived from the O&O data set in RAxML. For the MrBayes analyses 2 runs of four chains were run until convergence and a burnin of 20% of the points in the chains was used. ML-based character state reconstruction was performed using PAML 4 (15) under GTR +  $\Gamma$ .

## **Supplementary Results**

### **Comparison of our data-set specific matrices with available empirical GTR matrices.**

To better illustrate how our data-set specific GTR matrices (e.g. Tab S2) differs from the existing empirical time reversible matrices, we present (Fig. S2) a comparison of the differences in absolute substitution rates between WAG – the matrix used in (9, 10), MtRev – the matrix used in (11), and one of our GTR matrices the O&O-GTR matrix, which was derived from the Opsins & Outgroups alignment (O&O alignment; see Methods).

## **Supplementary Discussion**

**Methodological problems with the results of Plachetzki and collaborators.** The study of Plachetzki and collaborators (9) is, in part, methodologically flawed. This is because these authors did not include outgroups in their analyses as they “destabilize[d] the in-group topology”. Instead, they used the AU test to select the branch where their unrooted (and outgroup-less) phylogeny should have been rooted. However, the time reversible model (WAG + G + I) that they used to estimate site-wise likelihood values for the AU test does not discriminate between the rooted resolutions of an unrooted tree.

Accordingly, the differences between alternative rooting positions that they observed for a given unrooted topology must represent sampling and stochastic errors. Indeed, from a careful inspection of Plachetzki’s et al. (9) Table 1, it is clear that their AU tests (as expected) only let them discriminate between the three unrooted topologies in Plachetzki’s et al. (9) Figure 3, but not between the 15 rooted topologies reported in the same Figure. This invalidates the most important criterion used in (9) to select among alternative opsin phylogenies.

### **Supplementary References**

1. Stanke M, Diekhans M, Baertsch R, & Haussler D (2008) Using native and syntenically mapped cDNA alignments to improve de novo gene finding. *Bioinformatics* 24(5):637-644.
2. Loytynoja A & Goldman N (2008) Phylogeny-aware gap placement prevents errors in sequence alignment and evolutionary analysis. (Translated from eng) *Science* 320(5883):1632-1635.

3. Waterhouse AM, Procter JB, Martin DM, Clamp M, & Barton GJ (2009) Jalview Version 2--a multiple sequence alignment editor and analysis workbench. (Translated from eng) *Bioinformatics* 25(9):1189-1191.
4. Holton TA & Pisani D (2010) Deep Genomic-Scale Analyses of the Metazoa Reject Coelomata: Evidence from Single- and Multigene Families Analyzed Under a Supertree and Supermatrix Paradigm. *Genome Biology and Evolution* 2:310-324.
5. Stamatakis A (2006) RAxML-VI-HPC: maximum likelihood-based phylogenetic analyses with thousands of taxa and mixed models. (Translated from eng) *Bioinformatics* 22(21):2688-2690.
6. Lartillot N, Lepage T, & Blanquart S (2009) PhyloBayes 3: a Bayesian software package for phylogenetic reconstruction and molecular dating. (Translated from eng) *Bioinformatics* 25(17):2286-2288.
7. Quang LS, Gascuel O, & Lartillot N (2008) Empirical profile mixture models for phylogenetic reconstruction. *Bioinformatics* 24(20):2317-2323.
8. Shimodaira H (2002) An approximately unbiased test of phylogenetic tree selection. *Systematic Biology* 51(3):492-508.
9. Plachetzki DC, Degnan BM, & Oakley TH (2007) The Origins of Novel Protein Interactions during Animal Opsin Evolution. *Plos One* 2(10).
10. Plachetzki DC, Fong CR, & Oakley TH (2010) The evolution of phototransduction from an ancestral cyclic nucleotide gated pathway. *Proceedings of the Royal Society B-Biological Sciences* 277(1690):1963-1969.

11. Porter ML, *et al.* (2011) Shedding new light on opsin evolution. (Translated from Eng) *Proc Biol Sci* .
12. Suga H, Schmid V, & Gehring WJ (2008) Evolution and functional diversity of jellyfish opsins. *Current Biology* 18(1):51-55.
13. Williams PD, Pollock DD, Blackburne BP, & Goldstein RA (2006) Assessing the accuracy of ancestral protein reconstruction methods. (Translated from eng) *PLoS Comput Biol* 2(6):e69.
14. Ronquist F & Huelsenbeck JP (2003) MrBayes 3: Bayesian phylogenetic inference under mixed models. *Bioinformatics* 19(12):1572-1574.
15. Yang Z (2007) PAML 4: phylogenetic analysis by maximum likelihood. (Translated from eng) *Mol Biol Evol* 24(8):1586-1591.



**Table Supplementary 1:** Further information is provided for sequences that were not obtained from NCBI or when an accession number is not from NCBI or Uniprot.

| Sequence name in supplementary figures | Accession number | Further Information |
|----------------------------------------|------------------|---------------------|
| 001PapglRE_                            | AF077190_1       |                     |
| 002PieraRE_                            | BAD06459.1       |                     |
| 003DanplRE_                            | AAU07978.1       |                     |
| 004HelerRE_                            | AAY16540         |                     |
| 005PapglRE_                            | AAD29445.1       |                     |
| 006PapglRE_                            | AAD34220.1       |                     |
| 006RGRCafa_                            | XP_864762.1      |                     |
| 007ManseRE_                            | O02464.2         |                     |
| 007RGRBota_                            | NP_786969.1      |                     |
| 008BommoRE_                            | NP_001036882.1   |                     |
| 008RGRPatr_                            | XP_001154882.1   |                     |
| 009BommoRE_                            | NP_001036883.1   |                     |
| 009RGRHosa_                            | NP_002912.2      |                     |

|             |                |
|-------------|----------------|
| 010PapglRE_ | AAD34224.1     |
| 010RGRDare_ | NP_001017877.1 |
| 011ApomoRE_ | AAT91645.1     |
| 011hypXetr_ | NP_001016013.1 |
| 012LycruRE_ | AAT91638.1     |
| 012RGRGaga_ | NP_001026387.1 |
| 013ApomoRE_ | AAT91644.1     |
| 013OpsBrbe  | BAC76023.1     |
| 014PerBota  | NP_001179153.1 |
| 014SchgrRE_ | Q94741.1       |
| 015PerCafa  | XP_853139.1    |
| 015SphspRE_ | P35362.1       |
| 016OncniHE_ | AAU95194.1     |
| 016PerHosa  | NP_006574.1    |
| 017HomcoHE_ | AAT01077.1     |
| 017PerRano  | NP_001101196.1 |

|             |                |
|-------------|----------------|
| 018PerMumu  | NP_033128.1    |
| 018TricaRE_ | NP_001155991.1 |
| 019PerDare  | NP_001004654.1 |
| 019ThemaRE_ | ACH56536.1     |
| 020CamabRE_ | Q17292.1       |
| 020PerGaga  | NP_001073227.1 |
| 021CatboRE_ | Q17296.1       |
| 021NeuDare_ | NP_001186975.1 |
| 022AthroRE_ | BAG32517.1     |
| 022NeuTagu_ | XP_002189255.1 |
| 023ApimeRE_ | Q17053.1       |
| 023NeuGaga_ | NP_001124215.1 |
| 024NasviRE_ | NP_001164379.1 |
| 024NeuMumu_ | EDL23393       |
| 025AnogaRE_ | XP_003435758.1 |
| 025NeuRano_ | EDM18681.1     |

|             |                |
|-------------|----------------|
| 026AnogaRE_ | XP_003435763.1 |
| 026NeuBota_ | NP_001193009   |
| 027AnogaRE_ | XP_322000.4    |
| 027NeuPatr_ | XP_001146167.1 |
| 028AedaeRE_ | XP_001651997.1 |
| 028NeuHosa_ | EAX04324.1     |
| 029AedaeRE_ | XP_001657619.1 |
| 029NeuCafa_ | XP_003639476.1 |
| 030CulpiRE_ | XP_001862198.1 |
| 030NeuEqca_ | XP_001502825.2 |
| 031CulpiRE_ | XP_001862165.1 |
| 031NeuOran_ | XP_001511991.2 |
| 032AedaeRE_ | XP_001651167.1 |
| 032NeuModo_ | XP_001369202   |
| 033DianiRE_ | ACN39591.1     |
| 034AedaeRE_ | XP_001651998.1 |

|             |                |
|-------------|----------------|
| 035CulpiRE_ | XP_001862201.1 |
| 036CulpiRE_ | XP_001870286.1 |
| 037CulpiRE_ | XP_001863486   |
| 038CulpiRE_ | XP_001862200.1 |
| 038InsCuqu  | XP_001864551.1 |
| 039AcypiRE_ | XP_001947730.1 |
| 040MegviRE_ | AAG17119.1     |
| 040ParUtst_ | AAZ79904.1     |
| 041AnogaRE_ | XP_312478.1    |
| 041ParXetr_ | NP_001039256.1 |
| 042CulpiRE_ | XP_001845697.1 |
| 042OpsCiin_ | NP_001027727.1 |
| 043AedaeRE_ | XP_001652725.1 |
| 043uppTeni_ | CAG06878.1     |
| 044ApimeOC_ | NP_001071293.1 |
| 044ParLeja_ | BAD13381.1     |

|             |                |
|-------------|----------------|
| 045AnogaRE_ | XP_001238571.2 |
| 045ParIcpu_ | NP_001187002.1 |
| 046ParOnmy_ | NP_001117697.1 |
| 047PinPema_ | O42490.1       |
| 048PromiL1_ | O16020.1       |
| 048VAoXela_ | NP_001165363.1 |
| 049ProclL1_ | P35356.1       |
| 049VAoGaga_ | ABM66817.2     |
| 050OrcauL1_ | O18481.1       |
| 051CamluL1_ | O16017         |
| 052CamshL1_ | O16018.1       |
| 052VAoOrla_ | NP_001129987.1 |
| 053NeooeL1_ | ABG37009.1     |
| 053VAoCyca_ | AAF74260.1     |
| 054NeooeL1_ | ABG37007.1     |
| 054VAoDare_ | NP_571661.1    |

|             |                     |
|-------------|---------------------|
| 055LWSCami_ | ABU84863.1          |
| 055NeoamL1_ | ABI48892.1          |
| 056HolcoL1_ | ABI48880.1          |
| 057LitvaL1_ | ABH00987.1          |
| 057OpsPhma_ | AAD25917.1          |
| 058LWSLeja_ | BAD17958.1          |
|             | ThirdPartyAnnotatio |
| 058PeciL1_  | ns                  |
| 059HomgaL1_ | ABI48884.1          |
| 059LWSGeau_ | AAR14680.1          |
| 060EupsuL1_ | ABI48874.1          |
| 061ArcgrL1_ | ABI48869.1          |
| 062NeooeL1_ | ABG37008.1          |
|             | ThirdPartyAnnotatio |
| 063GampuL1_ | ns                  |
|             | ThirdPartyAnnotatio |
| 064GampuL1_ | ns                  |

|             |                     |
|-------------|---------------------|
| 065ParbaL1_ | ABY81016            |
| 066CasknL1_ | ABY81042.1          |
| 067MysdiL1_ | ABI48885.1          |
| 068HemanL1_ | ABY81040.1          |
| 069LimpoLW_ | P35360.1            |
| 070LimpoLW_ | P35361.1            |
| 071PlepaLW_ | BAG14334.1          |
| 072HasadLW_ | BAG14331.1          |
|             | ThirdPartyAnnotatio |
| 073IxoscLW_ | ns                  |
| 074PlepaLW_ | BAG14333.1          |
| 075HasadLW_ | BAG14330.1          |
| 076CalviOC_ | P22269.1            |
| 077DromeOC_ | NP_524398.1         |
| 078DromeOC_ | NP_524407.1         |
| 079BacdoOC_ | AAS88872.2          |



|             |            |
|-------------|------------|
| 080DappuM1_ | EFX77472.1 |
| 081DappuM1_ | EFX77473.1 |
| 082DappuM1_ | EFX77471.1 |
| 083DappuM1_ | EFX77474.1 |
| 084DappuM1_ | EFX77470.1 |
| 085DappuM1_ | EFX87234   |
| 086DappuM1_ | EFX77475.1 |
| 087DappuM1_ | EFX72327   |
| 088DappuM1_ | EFX72332.1 |
| 089DappuM1_ | EFX72332   |
| 090DappuM2_ | EFX63569.1 |
| 091DappuM2_ | EFX63570.1 |
| 092DappuM2_ | EFX63568.1 |
| 093DappuM2_ | EFX76309.1 |
| 094DappuM2_ | EFX63131.1 |
| 095DappuM2_ | EFX63277.1 |

|             |                     |
|-------------|---------------------|
| 096DappuM2_ | EFX66668.1          |
| 097PorpeM2_ | ABM74400            |
| 098HemsaM2_ | Q25158.1            |
| 099HemsaM2_ | Q25157.1            |
|             | ThirdPartyAnnotatio |
| 100PetcM2_  | ns                  |
|             | ThirdPartyAnnotatio |
| 101PetcM2_  | ns                  |
|             | ThirdPartyAnnotatio |
| 102PetcL1_  | ns                  |
| 103AedaeUV_ | XP_001653866.1      |
| 104CulpiUV_ | XP_001851157.1      |
| 105AnogaUV_ | XP_001688790.1      |
| 106TricaUV_ | XP_970344.1         |
| 107DianiUV_ | BAG71429.1          |
| 108ApimeUV_ | NP_001011605.1      |
| 109BomimUV_ | AAV67326.1          |

|             |              |
|-------------|--------------|
| 110CatboUV_ | AAC05091.1   |
| 111CamabUV_ | AAC05092     |
| 112NasviUV_ | XP_001608074 |
| 113CalviUV_ | CAI47588.1   |
| 114DromeUV_ | NP_524411.1  |
| 115DromeUV_ | NP_476701.1  |
| 116ApomoUV_ | AAT91642     |
| 117LycruUV_ | AAT91641.1   |
| 117SWSLoaf_ | AAT95414.1   |
| 118DanplUV_ | AAU07979.1   |
| 118SWSPtpu_ | ACL13195.1   |
| 119HelerUV_ | AAV16537.1   |
| 120PieraUV_ | BAE19944.1   |
| 120UVoCaau_ | Q90309.1     |
| 121ManseUV_ | O02465.2     |
| 121UVoCyca_ | BAC78823.1   |

|             |                |                     |
|-------------|----------------|---------------------|
| 122PapglUV_ | AAD34222.1     |                     |
| 122SWSDare_ | Q9W6A9.2       |                     |
| 123BommoUV_ | BmUVop1        | Velarde et al. 2005 |
| 124ManseBL_ | O96107.1       |                     |
| 125PapglBL_ | AAD34223.1     |                     |
| 125SWSSasa_ | NP_001117180.1 |                     |
| 126DanplBL_ | AAU07977.1     |                     |
| 126SWSOrla_ | NP_001098126.1 |                     |
| 127HelerBL_ | AAV16539       |                     |
| 128ApomoBL_ | AAT91643       |                     |
| 128SWSPore_ | ABB69699.1     |                     |
| 129LycruBL_ | AAT91639       |                     |
| 130GreDare_ | NP_571329.1    |                     |
| 130LycruBL_ | AAT91640.1     |                     |
| 131GreCaau_ | P32311.1       |                     |
| 131PieraBL_ | BAE19946.1     |                     |

|             |                |                     |
|-------------|----------------|---------------------|
| 132GreCyca_ | BAC76806.1     |                     |
| 132PieraBL_ | BAE19945.1     |                     |
| 133BommoBL_ | BmBLop         | Velarde et al. 2005 |
| 134CulpiBL_ | XP_001863546.1 |                     |
| 135CulpiBL_ | XP_001846641.1 |                     |
| 135SWSOrla_ | NP_001098125.1 |                     |
| 136AnogaBL_ | XP_319247.1    |                     |
| 136RH2Orla_ | BAE78649.1     |                     |
| 137AedaeBL_ | XP_001662982.1 |                     |
| 137GreTeni_ | AAT38458.1     |                     |
| 138GreTaru_ | NP_001028884.1 |                     |
| 138SchgrBL_ | Q26495.1       |                     |
| 139DianiBL_ | BAF45422.1     |                     |
| 140ApimeBL_ | NP_001011606.1 |                     |
| 141NasviBL_ | XP_001604622   |                     |
| 142OpsPhma_ | AAD25918.1     |                     |

|             |                |
|-------------|----------------|
| 143RH2Geau_ | AAR14683.1     |
| 143RH2Lach_ | AAD30520.1     |
| 144BrakuU1_ | BAG80984.1     |
| 144RH2Nefo_ | ABS89279.1     |
| 145AcypiUV_ | XP_001951588.1 |
| 145RH2Anca_ | XP_003220394.1 |
| 146MegviUV_ | AAG17120.1     |
| 146RH2Tagu_ | NP_001070164.1 |
| 147AcypiUV_ | XP_001951613   |
| 147GreAnpl_ | AAC41244.1     |
| 148RHOGaga_ | NP_990821.1    |
| 148TriloU1_ | BAG80983.1     |
| 149RodSasa_ | NP_001117008.1 |
| 149TrigrU1_ | BAG80978.1     |
| 150DappuU1_ | EFX81332.1     |
| 150ExoDare_ | NP_571287.1    |

|             |                |                     |
|-------------|----------------|---------------------|
| 151DappuU1_ | EFX75461.1     |                     |
| 151RodTaru_ | NP_001029021.1 |                     |
| 152PlepaUW_ | BAG14335.1     |                     |
| 153HasadUW_ | BAG14332.1     |                     |
| 153RhAGeau_ | AAR14682.1     |                     |
| 154AedaeR7_ | XP_001650744.1 |                     |
| 154RHOPema_ | Q98980.1       |                     |
| 155CulpiR7_ | XP_001861638.1 |                     |
| 155RHOLeja_ | P22671.1       |                     |
| 156AnogaR7_ | XP_308329.4    |                     |
| 156RHOLeja_ | P22671.1       |                     |
| 157DromeR7_ | NP_524035.2    |                     |
| 158BommoR7_ | BmUnop         | Velarde et al. 2005 |
| 158RHOSasa_ | NP_001117009.1 |                     |
| 159AcypiR7_ | XP_001944926   |                     |
| 159RHOLeer_ | P79863.1       |                     |

|             |                |
|-------------|----------------|
| 160AcypiR7_ | XP_001943275.1 |
| 160RHOScca_ | O93459.1       |
| 161DappuR7_ | EFX70801.1     |
| 161RHOCami_ | ABU84865.1     |
| 162DappuR7_ | EFX70796.1     |
| 162RHOPyre_ | ACS49830.1     |
| 163BrakuM1_ | BAG80992.1     |
| 163RHOAnpl_ | AAC41245.1     |
| 164RHOGaga_ | NP_001025777.1 |
| 165BrakuM1_ | BAG80990.1     |
| 165RHOTagu_ | NP_001070163.1 |
| 166BrakuM1_ | BAG80989.1     |
| 166RHOOran_ | NP_001121099.1 |
| 167BrakuM1_ | BAG80988.1     |
| 167RHOBota_ | NP_001014890   |
| 168BrakuM1_ | BAG80987.1     |



|             |                |
|-------------|----------------|
| 168RHOCapo_ | NP_001166556.1 |
| 169RHOSusc_ | NP_999386.1    |
| 170RHOOrcu_ | NP_001075818.1 |
| 171RHOHosa_ | NP_000530      |
| 171TriloM1_ | BAG80982.1     |
| 172RHORano_ | NP_254276.1    |
| 172TriloM2_ | BAG80981.1     |
| 173RHOMumu_ | NP_663358.1    |
| 173TrigrM1_ | BAG80980.1     |
| 174RHOMylu_ | ACT83436       |
| 174TrigrM1_ | BAG80979.1     |
| 175RHOFeca_ | NP_001009242.1 |
| 175TrigrM1_ | BAG80977.1     |
| 176RHOCafa_ | NP_001008277.1 |
| 176TrigrM2_ | BAG80976.1     |
| 177OpsCypy_ | BAB55452.1     |

|             |                  |
|-------------|------------------|
| 177UcavoM2_ | ACT31580.1       |
| 178UcavoM2_ | ACT31581.1       |
| 179LucrRE_  | BAH56227.1       |
| 180LucrUV_  | BAH56228.1       |
| 181ThemaUV_ | ACH56538.1       |
| 182ThemaUV_ | ACH56537.1       |
| 183PedhuUV_ | XP_002422743.1   |
| 184PedhuR7_ | XP_002432663.1   |
| 185PedhuRE_ | XP_002427337.1   |
|             | EST assembled by |
| 186LocmiRE_ | Stuart Longhorn  |
|             | EST assembled by |
| 187LaukoBL_ | Stuart Longhorn  |
|             | EST assembled by |
| 189LaukoUV_ | Stuart Longhorn  |
| 190NasviOC_ | XP_003427472     |
| 191RhoprUV_ | EST assembled by |

|             |                  |
|-------------|------------------|
|             | Stuart Longhorn  |
|             | EST assembled by |
| 192RhoprRE_ | Stuart Longhorn  |
|             | EST assembled by |
| 193EurpuM2_ | Stuart Longhorn  |
| 193RHOTaru_ | AAD54580         |
|             | EST assembled by |
| 194EurpuL1_ | Stuart Longhorn  |
| 194RHOPore_ | ABI33106.1       |
| 195NeoinL1_ | ACI32558.1       |
| 195RHOOra_  | BAD99136.1       |
| 196NeoinL1_ | ACI32557.1       |
| 196RH1Anan_ | ACR50957.1       |
| 197NeoinL1_ | ACI32556.1       |
| 198NeoinL1_ | ACI32555.1       |
| 199RHOCyca_ | CAA96518.1       |
| 199RhoprR7_ | CAA96518         |

|             |                |
|-------------|----------------|
| 200IxoscR7_ | XP_002408319   |
| 200RHODare_ | P35359.2       |
| 201BluGeau_ | AAR14681.1     |
| 201NeooeL1_ | ACU00223       |
| 202NeooeL1_ | ACU00224.1     |
| 202OpsCypy_ | BAB39378.1     |
| 203NeooeL1_ | ACU00222.1     |
| 203OpsRaca_ | BAA76864.1     |
| 204NeooeL1_ | ACU00210.1     |
| 204SWSNefo_ | ABS89282.1     |
| 205BluGaga_ | NP_990848.1    |
| 205NeooeL1_ | ACU00218       |
| 206NeooeL1_ | ACU00212.1     |
| 206SWSOran_ | NP_001121098.1 |
| 207NeooeL1_ | ACU00215       |
| 207SWSTaac_ | ACD85829.1     |

|             |                |
|-------------|----------------|
| 208LimpoMW_ | ACO05013.1     |
| 208SWSTagu_ | NP_001070165.1 |
| 209SWSAnca_ | XP_003216951.1 |
| 210BluCyca_ | BAC78822.1     |
| 211SWSDare_ | NP_571267.1    |
| 212SWSSasa_ | NP_001117178.1 |
| 215SWSLugo_ | AAP57197.1     |
| 217BluTaru_ | AAT38459.1     |
| 218uppTeni_ | CAF96876.1     |
| 219SWSOrla_ | BAE78651.1     |
| 220SWSLugo_ | AAP57196.1     |
| 224SWSOrla_ | BAE78650.1     |
| 226OpsPldu_ | AAV63834.1     |
| 227EncHepu_ | BAH28806.1     |
| 228EncDare_ | NP_001104634.1 |
| 229EncHosa_ | NP_055137      |

|                 |                |
|-----------------|----------------|
| 230EncMumu_     | AAI05920.1     |
| 231OPSBrebe_    | BAC76022.1     |
| 232TMTTagu_     | XP_002192755.1 |
| 233TMTDare_     | AAL83431.1     |
| 234TMTTaru_     | NP_001027778.1 |
| 237MelFeca_     | NP_001009325.1 |
| Adr_PEP_A6QPN2_ | A6QPN2         |
| Adr_PEP_O15218_ | O15218         |
| Adre_AMI_A2RUS0 | A2RUS0         |
| Adre_AMI_AA2DB/ | AA2DB          |
| All_PEP_A4IJ48_ | A4IJ48         |
| All_PEP_NP_0010 | NP_001027135   |

Sequence assembled from  
the Amphimedon genome  
(see methods)

Amq\_15741g/58-2

—

Sequence assembled from  
the Amphimedon genome

Amq\_15747g/52-2

—

(see methods)

Sequence assembled from  
the Amphimedon genome

Amq\_7171g7/177-

\_

(see methods)

Ana\_PEP\_O55197/

O55197

Ana\_PEP\_Q16581/

Q16581

ANG\_PEP\_A2AUT5/

A2AUT5

ANG\_PEP\_Q9WV26/

Q9WV26

APJ\_PEP\_Q7SZP9/

Q7SZP9

APJ\_PEP\_Q9JHG3/

Q9JHG3

Bil\_NP\_00107065

NP\_00107065

Bil\_Q8TDU6/1-12

Q8TDU6

BOM\_PEP\_A9UJU7/

A9UJU7

BOM\_PEP\_P35371/

P35371

BRA\_PEP\_P48748/

P48748

BRA\_PEP\_Q9BDQ5/

Q9BDQ5

|                  |              |
|------------------|--------------|
| CAN_B1AZT0_117/  | B1AZT0       |
| CAN_P47936_/1-1  | P47936       |
| Cap_NP_00109170  | NP_001091702 |
| Cap_XP_00195801  | XP_001958016 |
| CCK1_PEP_A2VEY/  | A2VEY5       |
| CCK1_PEP_B2L04/  | B2L044       |
| CCR_PEP_32246_ / | NP_001286    |
| CCR_PEP_A9LS67/  | A9LS67       |
| Che_PEP_B0F9W3_  | B0F9W3       |
| Che_PEP_Q8BMP4_  | Q8BMP4       |
| CL_CN168_A       | BAF95836.1   |
| CIR_CN101S       | BAF95825.1   |
| CIR_CN102S       | BAF95826.1   |
| CIR_CN103S       | BAF95828.1   |
| CIR_CN104S       | BAF95827.1   |
| CIR_CN105S       | BAF95842.1   |



|            |            |
|------------|------------|
| CIR_CN106S | BAF95837.1 |
| CIR_CN107S | BAF95836.1 |
| CIR_CN108S | B332436.1  |
| CIR_CN109S | BAF95838.1 |
| CIR_CN110S | BAF95835.1 |
| CIR_CN111S | BAF95834.1 |
| CIR_CN112S | BAF95846.1 |
| CIR_CN113S | AB332437.1 |
| CIR_CN114S | BAF95846.1 |
| CIR_CN115S | AB332436.1 |
| CIR_CN116S | BAF95842.1 |
| CIR_CN117S | BAF95841.1 |
| CIR_CN118S | BAF95840.1 |
| CIR_CN119S | BAF95838.1 |
| CIR_CN120S | BAF95833.1 |
| CIR_CN121S | BAF95832.1 |

|                  |              |
|------------------|--------------|
| CIR_CN122S       | BAF95831.1   |
| CIR_CN123S       | BAF95830.1   |
| CIR_CN124S       | BAF95829.1   |
| CIR_CN125S       | BAF95828.1   |
| CIR_CN126S       | BAF95827.1   |
| CIR_CN127S       | BAF95826.1   |
| CIR_CN128S       | BAF95825.1   |
| CR_CN100_K       | BAG80696.1   |
| Cys_B9UM22/1-15  | B9UM22       |
| Cys_Q2NNR5/1-15  | Q2NNR5       |
| DOP_AMI_5HTB1_/_ | 5HTB1        |
| DOP_AMI_DRD1_BO  | NP_776467    |
| EBV_B3DJU7/3-15  | B3DJU7       |
| EBV_NP_00110285  | NP_001102856 |
| Ecd_A7J264/1-17  | A7J264       |
| Ecd_NP_00107679  | NP_001076793 |

|                 |              |
|-----------------|--------------|
| End_PEP_A1Y2B8/ | A1Y2B8       |
| End_PEP_Q5KSU9/ | Q5KSU9       |
| fat_O14842/1-15 | O14842       |
| Fat_Q76EI6/1-15 | Q76EI6       |
| Fme_PEP_B6V697/ | B6V697       |
| Fme_PEP_C1BIM3/ | C1BIM3       |
| G151_NP_853664_ | NP_853664    |
| G151_Q7TSN6/7-1 | Q7TSN6       |
| Gal_PEP_A1XE40_ | A1XE40       |
| Gal_PEP_B6VCU2_ | B6VCU2       |
| GPR_PEP_Q17QD8_ | Q17QD8       |
| GRH_A1YZ03_/1-1 | A1YZ03       |
| GRH_A3DT36_/1-1 | A3DT36       |
| GRH_NP_00107680 | NP_001076809 |
| GRH_Q1JQR7_/1-1 | Q1JQR7       |
| His_AMI_P97292/ | P97292       |

|                 |                |                          |
|-----------------|----------------|--------------------------|
| His_AMI_Q9H3N8/ | Q9H3N8         |                          |
| HM_CN131_2      | XP_002163358.1 |                          |
| HM_CN132_2      | XP_002163327.1 |                          |
| HM_CN133_2      | XP_002163209.1 |                          |
| HM_CN134_2      | XP_002157157.1 |                          |
| HM_CN170_U      | XP_002160448.1 |                          |
| HM_CNOK_CN      | _              | Plachetzki et al. (2010) |
| HM_CNOK_CV      | _              | Plachetzki et al. (2010) |
| HYM_389753/127- | XP_002155960.1 |                          |
| HYM_389901_gi 2 | XP_002160138.1 |                          |
| HYM_397544/212- | XP_002169896.1 |                          |
| HYM_398697_gi 2 | XP_002170651.1 |                          |
| Int_PEP_P55920/ | P55920         |                          |
| Int_PEP_Q2YEG2/ | Q2YEG2         |                          |
| Leu_C0HBJ9/1-16 | C0HBJ9         |                          |
| Leu_NP_062813/1 | NP_062813      |                          |

|                 |              |
|-----------------|--------------|
| LGR_B7ZMU5/10-1 | B7ZMU5       |
| LGR_Q9HBX8/62-1 | Q9HBX8       |
| Lys_B5B0C1_/1-1 | B5B0C1       |
| Lys_NP_00107501 | NP_001075010 |
| Lys_NP_00108763 | NP_001087636 |
| Lys_Q9BZJ6/1-17 | Q9BZJ6       |
| Lys_Q9PU17_/3-1 | Q9PU17       |
| MAS_B7ZP12/1-16 | B7ZP12       |
| MAS_P30554/1-15 | P30554       |
| MCR_PEP_B7T8C8/ | B7T8C8       |
| MCR_PEP_Q8TDT2/ | Q8TDT2       |
| Mel_PEP_A0N0W9/ | A0N0W9       |
| Mel_PEP_A8QXQ2/ | A8QXQ2       |
| MLT_B2Y4M8_/1-1 | B2Y4M8       |
| MLT_O88495_/1-1 | O88495       |
| MTR1C_XENL/7-16 | P49219       |

|                 |                |
|-----------------|----------------|
| MUS_AMI_P11229/ | P11229         |
| MUS_AMI_Q09388/ | Q09388         |
| NEM_426957_jgi  | see methods    |
| NEM_430210_jgi  | XP_001625478.1 |
| NEM_432155_jgi  | XP_001641580.1 |
| NEM_444070_jgi  | XP_001637517.1 |
| NEM_444623_jgi  | XP_001635321.1 |
| NEM_445570_jgi  | XP_001631194.1 |
| NeT_PEP_Q538H6_ | Q538H6         |
| NeT_PEP_Q538H7_ | Q538H7         |
| Neu_PEP_C0J0A7_ | C0J0A7         |
| Neu_PEP_Q9TTQ9_ | Q9TTQ9         |
| Nme_PEP_A7XII4_ | A7XII4         |
| Nme_PEP_B1NPT7_ | B1NPT7         |
| NUC_B0BLU4_/7-1 | B0BLU4         |
| NUC_P28190_/1-1 | P28190         |

|                |                |
|----------------|----------------|
| NV_CN135_Suga0 | FAA00413.1     |
| NV_CN136Su     | FAA00411.1     |
| NV_CN136Suga20 | 43FAA00412.1   |
| NV_CN137Suga08 | FAA00410.1     |
| NV_CN138Suga08 | FAA00409.1     |
| NV_CN139Suga08 | FAA00408.1     |
| NV_CN140Suga08 | FAA00407.1     |
| NV_CN141Suga08 | FAA00406.1     |
| NV_CN142Suga08 | FAA00405.1     |
| NV_CN143Suga08 | FAA00404.1     |
| NV_CN144Suga08 | FAA00403.1     |
| NV_CN145Suga08 | XP_001632018.1 |
| NV_CN146Su     | FAA00401.1     |
| NV_CN147Su     | FAA00400.1     |
| NV_CN148Suga08 | FAA00399.1     |
| NV_CN149Suga08 | FAA00398.1     |

|                 |                |
|-----------------|----------------|
| NV_CN150Suga08  | FAA00397.1     |
| NV_CN151Su      | FAA00396.1     |
| NV_CN152Su      | FAA00394.1     |
| NV_CN153Su      | FAA00394.1     |
| NV_CN154Su      | FAA00393.1     |
| NV_CN155Su      | FAA00392.1     |
| NV_CN156Su      | XP_001622972.1 |
| NV_CN157Su      | FAA00390.1     |
| NV_CN158Su      | FAA00389.1     |
| NV_CN159Su      | FAA00388.1     |
| NV_CN160Su      | FAA00387.1     |
| NV_CN161Su      | FAA00386.1     |
| NV_CN162Su      | FAA00385.1     |
| NV_CN163Su      | FAA00384.1     |
| NV_CN164Su      | BR000656.1     |
| Octo_AMI_A8E6P6 | A8E6P6         |



|                 |                  |
|-----------------|------------------|
| Octo_AMI_Q93127 | Q93127           |
|                 | EST assembled by |
| OG10HelobP_     | Stuart Longhorn  |
|                 | EST assembled by |
| OG11HelobP_     | Stuart Longhorn  |
| OG12HelobP_     | O15973           |
| OG13HelobP_     | P09241           |
| OG14EupryP_     | ACB05672.1       |
|                 | EST assembled by |
| OG17SchmaP_     | Stuart Longhorn  |
| OG18SchimP_     | XP_002581174.1   |
|                 | EST assembled by |
| OG19SchmiP_     | Stuart Longhorn  |
| OG1LoligoP_     | P24603.1         |
| OG21HomspM_     | AAI13559.1       |
| OG22PanpaM_     | XP_001135533.1   |
| OG23BostaM_     | NP_001179328     |

|             |                  |
|-------------|------------------|
| OG24MusmuM_ | NP_001122071.1   |
| OG25MondoM_ | XP_001377369     |
| OG26GalgaM_ | NP_001038118.1   |
|             | EST assembled by |
| OG27TakruM_ | Stuart Longhorn  |
|             | EST assembled by |
| OG28OrylaM_ | Stuart Longhorn  |
| OG29DanreM_ | NP_001122233     |
| OG2Sepia2P_ | O16005.1         |
| OG30DanreM_ | XP_694492        |
|             | EST assembled by |
| OG31OrylaM_ | Stuart Longhorn  |
| OG34GalgaD_ | NP_989956        |
| OG35XenlaD_ | NP_001079143.1   |
|             | EST assembled by |
| OG36TakruD_ | Stuart Longhorn  |
| OG37OrylaD_ | EST assembled by |

|             |                  |
|-------------|------------------|
|             | Stuart Longhorn  |
| OG38DanreD_ | ADN39434         |
|             | EST assembled by |
| OG39TakruD_ | Stuart Longhorn  |
| OG3TodaroP_ | P31356.2         |
|             | EST assembled by |
| OG40OrylaD_ | Stuart Longhorn  |
| OG41BraflM_ | XP_002596283.1   |
|             | EST assembled by |
| OG42BraflM_ | Stuart Longhorn  |
| OG43AnogaT  | XP_312502.2      |
| OG44AnogaT  | XP_312503        |
| OG45ApimeT  | NP_001035057.1   |
|             | EST assembled by |
| OG46RhoprT  | Stuart Longhorn  |
|             | EST assembled by |
| OG47TricaT  | Stuart Longhorn  |

|                 |                  |
|-----------------|------------------|
| OG48AcypiT      | XP_001952294     |
|                 | EST assembled by |
| OG49DappuT      | Stuart Longhorn  |
| OG4OctopuP_     | P09241.1         |
|                 | EST assembled by |
| OG50DappuT      | Stuart Longhorn  |
|                 | EST assembled by |
| OG5LottiaP_     | Stuart Longhorn  |
| OG6PatinoP_     | O15973.1         |
| OG7PlatynP_     | CAC86665.1       |
|                 | EST assembled by |
| OG8CapiteP_     | Stuart Longhorn  |
| OG9SchmaMP_     | AAF73286.1       |
| Olf_NP_00100020 | NP_001000202     |
| Olf_NP_00100038 | NP_001000385     |
| Olf_NP_00100135 | NP_001001353     |
| Olf_NP_00100182 | NP_001001821     |

|                 |              |                                                                  |
|-----------------|--------------|------------------------------------------------------------------|
| Opi_PEP_B3DK58_ | B3DK58       | Sequence from GPCRdb                                             |
| Opi_PEPt_B3DH72 | B3DH72       | Sequence from GPCRdb                                             |
| Ore_PEP_NP_0011 | NP_001019755 |                                                                  |
| Ore_PEPt_NP_001 | NP_001002933 |                                                                  |
| ORM_NP_732265/1 | NP_732265    |                                                                  |
| ORM_NP_999614/1 | NP_999614    |                                                                  |
| ORM_Q6PQA5_/3-1 | Q6PQA5       | Sequence from GPCRdb                                             |
| ORM_Q7ZZC0_/3-1 | Q7ZZC0       | Sequence from GPCRdb                                             |
| ORM_XP_538488/1 | XP_538488    |                                                                  |
| Osc_348883g7549 | _            | Sequence assembled from<br>the Oscarella genome (see<br>methods) |
| Oth_A9XG45_/1-1 | A9XG45       | Sequence from GPCRdb                                             |
| oth_Q7TMA4_/1-1 | Q7TMA4       |                                                                  |
| oth_Q7TMA4_/125 | Q7TMA4       |                                                                  |
| PC_CN130_O      | NP_001000202 |                                                                  |

|                 |              |                        |
|-----------------|--------------|------------------------|
| PC_CN165Su      | NP_001000385 |                        |
| PC_CN166Su      | NP_001001353 |                        |
| Pla_C1BIQ7_51/1 | C1BIQ7       | Sequence from GPCRdb   |
| Pla_NP_0010796/ | NP_001079640 |                        |
| Plos1_1_1-      | XP_001622972 |                        |
| Plos1_2_1-      | FAA00390     |                        |
| Plos1_3_2-      | 130042*      | Plachetzki et al. 2007 |
| Plos1_4_8-130   | 108738*      | Plachetzki et al. 2007 |
| PND_A0PJP9/7-17 | A0PJP9       | Sequence from GPCRdb   |
| PND_NP_000944/1 | NP_000944    |                        |
| PND_NP_000951/1 | NP_000951    |                        |
| PND_NP_001051/1 | NP_001051    |                        |
| PNE_A2RT90_/2-1 | A2RT90       |                        |
| PNE_NP_00107638 | NP_001076382 |                        |
| PRK_PEP_NP_0673 | NP_067356    |                        |
| PRK_PEP_NP_6204 | NP_620433    |                        |

|                  |             |                      |
|------------------|-------------|----------------------|
| Pro_PEP_B5XBJ7_  | B5XBJ7      | Sequence from GPCRdb |
| Pro_PEP_C0H8V6_  | C0H8V6      | Sequence from GPCRdb |
| Pro_PEP_NP_0011  | b3xxm4      | Sequence from GPCRdb |
| Pro_PEP_NP_9639  | NP_963909   | Sequence from GPCRdb |
| RDC_A8KBU0/1-15  | A8KBU0      | Sequence from GPCRdb |
| RDC_NP_00102560  | A5YC96      | Sequence from GPCRdb |
| Ser_AM_P28222_ / | P28222      | Sequence from GPCRdb |
| Ser_AMI_P46636/  | P46636      | Sequence from GPCRdb |
| Som_PEP_NP_0010  | NP001005844 |                      |
| Som_PEP_NP_0011  | NP001077348 |                      |
| SRE_A4KUT4/6-15  | A4KUT4      | Sequence from GPCRdb |
| SRE_A4KUT9/6-15  | A4KUT9      | Sequence from GPCRdb |
| Tac_PEP_P16177_  | P16177      | Sequence from GPCRdb |
| Tac_PEP_P51144_  | P51144      | Sequence from GPCRdb |
| Thy_A5A4L0/1-19  | A5A4L0      | Sequence from GPCRdb |
| Thy_B7ZQE5/1-17  | B7ZQE5      | Sequence from GPCRdb |

| Thy_O43193/1-19 | O43193         | Sequence from GPCRdb |
|-----------------|----------------|----------------------|
| Tra_429091jgi T | XP_002112437.1 |                      |
| Tra_429092jgi T | XP_002112438.1 |                      |
| Tra_430364jgi T | XP_002113363.1 |                      |
| Tra_433402jgi T | XP_002108360.1 |                      |
| Tra_434217jgi T | XP_002109502.1 |                      |
| Tra_435633jgi T | XP_002114578.1 |                      |
| Tra_435634jgi T | XP_002114579.1 |                      |
| Tra_435635jgi T | XP_002114580.1 |                      |
| Tra_435650jgi T | XP_002114588.1 |                      |
| Tra_435652jgi T | XP_002114760.1 |                      |
| Tra_435653jgi T | XP_002114761.1 |                      |
| Tra_435654jgi T | XP_002114762.1 |                      |
| Tra_435655jgi T | XP_002114763.1 |                      |
| Tra_435656jgi T | XP_002114590.1 |                      |
| Tra_435667jgi T | XP_002114592.1 |                      |



|                  |                |                      |
|------------------|----------------|----------------------|
| Tra_435668jgi T  | XP_002114593.1 |                      |
| Tra_435785jgi T  | XP_002114830.1 |                      |
| Tra_436148jgi T  | XP_002115630.1 |                      |
| Tra_436149jgi T  | XP_002115529.1 |                      |
| TRA_523894/4-18  | XP_002112613.1 |                      |
| TRA_526691/4-16  | XP_002107746.1 |                      |
| TRA_526907/14-1  | XP_002107856.1 |                      |
| TRA_530235_jgi   | XP_002114830.1 |                      |
| TRA_AMI_A5JMD0_  | A5JMD0         | Sequence from GPCRdb |
| TRA_AMI_P35412_  | P35412         | Sequence from GPCRdb |
| UPI0001560/4-18  | upi000156058b  | uniprot-reference    |
| Uro_PEP_NP_0010  | NP_001041476   |                      |
| Uro_PEPt_NP_001  | NP_001028066   |                      |
| Vas_PEP_B0K WV9_ | B0K WV9        | Sequence from GPCRdb |
| Vas_PEP_B7PVR8_  | B7PVR8         | Sequence from GPCRdb |
| VIR_Q0PQ15/1-15  | Q0PQ15         |                      |

VIR\_Q2FA77/10-1

Q2FA77

VIR\_Q6VFU4/2-15

Q6VFU4

VIR\_Q6VFU7/2-14

Q6VFU7

---

**Table Supplementary 2:** Comparison of our O&O specific GTR Matrix (see Methods) against the WAG and mtREV matrices (see also main text and Fig. S2).

| Substitution | WAG      |           |                      | GTR-O&O   |           |                      | mtrev  |           |                      |
|--------------|----------|-----------|----------------------|-----------|-----------|----------------------|--------|-----------|----------------------|
|              | Rate     | Frequency | Global Exchange Rate | Rate      | Frequency | Global Exchange Rate | Rate   | Frequency | Global Exchange Rate |
| A <-> R      | 0.551571 | 0.0866279 | 0.047781437          | 0.372470  | 0.086381  | 0.032174331          | 23.18  | 0.072     | 1.66896              |
| A <-> N      | 0.509848 | 0.0866279 | 0.044167062          | 0.000017  | 0.086381  | 1.46848E-06          | 26.95  | 0.072     | 1.9404               |
| A <-> D      | 0.738998 | 0.0866279 | 0.064017845          | 0.000020  | 0.086381  | 1.72762E-06          | 17.67  | 0.072     | 1.27224              |
| A <-> C      | 1.02704  | 0.0866279 | 0.088970318          | 4.641280  | 0.086381  | 0.400918408          | 59.93  | 0.072     | 4.31496              |
| A <-> Q      | 0.908598 | 0.0866279 | 0.078709937          | 0.977853  | 0.086381  | 0.08446792           | 1.9    | 0.072     | 0.1368               |
| A <-> E      | 1.58285  | 0.0866279 | 0.137118972          | 3.679594  | 0.086381  | 0.317847009          | 9.77   | 0.072     | 0.70344              |
| A <-> G      | 1.41672  | 0.0866279 | 0.122727478          | 12.167335 | 0.086381  | 1.051026565          | 120.71 | 0.072     | 8.69112              |
| A <-> H      | 0.316954 | 0.0866279 | 0.027457059          | 0.950991  | 0.086381  | 0.082147554          | 13.9   | 0.072     | 1.0008               |
| A <-> I      | 0.193335 | 0.0866279 | 0.016748205          | 0.000010  | 0.086381  | 8.6381E-07           | 96.49  | 0.072     | 6.94728              |
| A <-> L      | 0.397915 | 0.0866279 | 0.034470541          | 2.024126  | 0.086381  | 0.174846028          | 25.46  | 0.072     | 1.83312              |
| A <-> K      | 0.906265 | 0.0866279 | 0.078507834          | 0.815173  | 0.086381  | 0.070415459          | 8.36   | 0.072     | 0.60192              |
| A <-> M      | 0.893496 | 0.0866279 | 0.077401682          | 2.787964  | 0.086381  | 0.240827118          | 141.88 | 0.072     | 10.21536             |
| A <-> F      | 0.210494 | 0.0866279 | 0.018234653          | 1.852747  | 0.086381  | 0.160042139          | 6.37   | 0.072     | 0.45864              |

|         |          |           |             |           |          |             |        |       |          |
|---------|----------|-----------|-------------|-----------|----------|-------------|--------|-------|----------|
| A <-> P | 1.43855  | 0.0866279 | 0.124618566 | 3.358082  | 0.086381 | 0.290074481 | 54.31  | 0.072 | 3.91032  |
| A <-> S | 3.37079  | 0.0866279 | 0.292004459 | 20.448209 | 0.086381 | 1.766336742 | 387.86 | 0.072 | 27.92592 |
| A <-> T | 2.12111  | 0.0866279 | 0.183747305 | 11.897744 | 0.086381 | 1.027739024 | 480.72 | 0.072 | 34.61184 |
| A <-> W | 0.113133 | 0.0866279 | 0.009800474 | 0.450487  | 0.086381 | 0.038913518 | 1.9    | 0.072 | 0.1368   |
| A <-> Y | 0.240735 | 0.0866279 | 0.020854368 | 0.360413  | 0.086381 | 0.031132835 | 6.48   | 0.072 | 0.46656  |
| A <-> V | 2.00601  | 0.0866279 | 0.173776434 | 11.920004 | 0.086381 | 1.029661866 | 195.06 | 0.072 | 14.04432 |
| R <-> N | 0.635346 | 0.043972  | 0.027937434 | 2.169673  | 0.032432 | 0.070366835 | 13.24  | 0.019 | 0.25156  |
| R <-> D | 0.147304 | 0.043972  | 0.006477251 | 0.000017  | 0.032432 | 5.51344E-07 | 1.9    | 0.019 | 0.0361   |
| R <-> C | 0.528191 | 0.043972  | 0.023225615 | 1.170041  | 0.032432 | 0.03794677  | 103.33 | 0.019 | 1.96327  |
| R <-> Q | 3.0355   | 0.043972  | 0.133477006 | 22.282424 | 0.032432 | 0.722663575 | 220.99 | 0.019 | 4.19881  |
| R <-> E | 0.439157 | 0.043972  | 0.019310612 | 1.223350  | 0.032432 | 0.039675687 | 1.9    | 0.019 | 0.0361   |
| R <-> G | 0.584665 | 0.043972  | 0.025708889 | 2.100493  | 0.032432 | 0.068123189 | 23.03  | 0.019 | 0.43757  |
| R <-> H | 2.13715  | 0.043972  | 0.09397476  | 23.663289 | 0.032432 | 0.767447789 | 165.23 | 0.019 | 3.13937  |
| R <-> I | 0.186979 | 0.043972  | 0.008221841 | 0.803347  | 0.032432 | 0.02605415  | 1.9    | 0.019 | 0.0361   |
| R <-> L | 0.497671 | 0.043972  | 0.021883589 | 0.427901  | 0.032432 | 0.013877685 | 15.58  | 0.019 | 0.29602  |
| R <-> K | 5.35142  | 0.043972  | 0.23531264  | 40.425046 | 0.032432 | 1.311065092 | 141.4  | 0.019 | 2.6866   |
| R <-> M | 0.683162 | 0.043972  | 0.030039999 | 2.139456  | 0.032432 | 0.069386837 | 1.9    | 0.019 | 0.0361   |
| R <-> F | 0.102711 | 0.043972  | 0.004516408 | 0.000017  | 0.032432 | 5.51344E-07 | 4.69   | 0.019 | 0.08911  |
| R <-> P | 0.679489 | 0.043972  | 0.02987849  | 2.000515  | 0.032432 | 0.064880702 | 23.64  | 0.019 | 0.44916  |

|         |           |           |             |           |          |             |        |       |          |
|---------|-----------|-----------|-------------|-----------|----------|-------------|--------|-------|----------|
| R <-> S | 1.22419   | 0.043972  | 0.053830083 | 2.560823  | 0.032432 | 0.083052612 | 6.04   | 0.019 | 0.11476  |
| R <-> T | 0.554413  | 0.043972  | 0.024378648 | 1.173869  | 0.032432 | 0.038070919 | 2.08   | 0.019 | 0.03952  |
| R <-> W | 1.16392   | 0.043972  | 0.05117989  | 0.935704  | 0.032432 | 0.030346752 | 21.95  | 0.019 | 0.41705  |
| R <-> Y | 0.381533  | 0.043972  | 0.016776769 | 1.162188  | 0.032432 | 0.037692081 | 1.9    | 0.019 | 0.0361   |
| R <-> V | 0.251849  | 0.043972  | 0.011074304 | 0.053303  | 0.032432 | 0.001728723 | 7.64   | 0.019 | 0.14516  |
| N <-> D | 5.42942   | 0.0390894 | 0.21223277  | 27.690006 | 0.033128 | 0.917314519 | 794.38 | 0.039 | 30.98082 |
| N <-> C | 0.265256  | 0.0390894 | 0.010368698 | 0.347347  | 0.033128 | 0.011506911 | 58.94  | 0.039 | 2.29866  |
| N <-> Q | 1.54364   | 0.0390894 | 0.060339961 | 6.320799  | 0.033128 | 0.209395429 | 173.56 | 0.039 | 6.76884  |
| N <-> E | 0.947198  | 0.0390894 | 0.037025402 | 3.176395  | 0.033128 | 0.105227614 | 63.05  | 0.039 | 2.45895  |
| N <-> G | 1.12556   | 0.0390894 | 0.043997465 | 2.943707  | 0.033128 | 0.097519125 | 53.3   | 0.039 | 2.0787   |
| N <-> H | 3.95629   | 0.0390894 | 0.154649002 | 27.610338 | 0.033128 | 0.914675277 | 496.13 | 0.039 | 19.34907 |
| N <-> I | 0.554236  | 0.0390894 | 0.021664753 | 0.978221  | 0.033128 | 0.032406505 | 27.1   | 0.039 | 1.0569   |
| N <-> L | 0.131528  | 0.0390894 | 0.005141351 | 0.054517  | 0.033128 | 0.001806039 | 15.16  | 0.039 | 0.59124  |
| N <-> K | 3.01201   | 0.0390894 | 0.117737664 | 5.958845  | 0.033128 | 0.197404617 | 608.7  | 0.039 | 23.7393  |
| N <-> M | 0.198221  | 0.0390894 | 0.00774834  | 1.006164  | 0.033128 | 0.033332201 | 65.41  | 0.039 | 2.55099  |
| N <-> F | 0.0961621 | 0.0390894 | 0.003758919 | 0.437898  | 0.033128 | 0.014506685 | 15.2   | 0.039 | 0.5928   |
| N <-> P | 0.195081  | 0.0390894 | 0.007625599 | 0.120693  | 0.033128 | 0.003998318 | 73.31  | 0.039 | 2.85909  |
| N <-> S | 3.97423   | 0.0390894 | 0.155350266 | 12.921326 | 0.033128 | 0.428057688 | 494.39 | 0.039 | 19.28121 |
| N <-> T | 2.03006   | 0.0390894 | 0.079353827 | 5.945131  | 0.033128 | 0.1969503   | 238.46 | 0.039 | 9.29994  |
| N <-> W | 0.0719167 | 0.0390894 | 0.002811181 | 0.588512  | 0.033128 | 0.019496226 | 10.68  | 0.039 | 0.41652  |
| N <-> Y | 1.086     | 0.0390894 | 0.042451088 | 2.568378  | 0.033128 | 0.085085226 | 191.36 | 0.039 | 7.46304  |
| N <-> V | 0.196246  | 0.0390894 | 0.007671138 | 0.000017  | 0.033128 | 5.63176E-07 | 1.9    | 0.039 | 0.0741   |

|         |           |           |             |           |          |             |        |       |          |
|---------|-----------|-----------|-------------|-----------|----------|-------------|--------|-------|----------|
| D <-> C | 0.0302949 | 0.0570451 | 0.001728176 | 0.000017  | 0.017614 | 2.99438E-07 | 1.9    | 0.019 | 0.0361   |
| D <-> Q | 0.616783  | 0.0570451 | 0.035184448 | 26.277467 | 0.017614 | 0.462851304 | 55.28  | 0.019 | 1.05032  |
| D <-> E | 6.17416   | 0.0570451 | 0.352205575 | 24.935950 | 0.017614 | 0.439221823 | 583.55 | 0.019 | 11.08745 |
| D <-> G | 0.865584  | 0.0570451 | 0.049377326 | 6.865523  | 0.017614 | 0.120929322 | 56.77  | 0.019 | 1.07863  |
| D <-> H | 0.930676  | 0.0570451 | 0.053090505 | 8.900523  | 0.017614 | 0.156773812 | 113.99 | 0.019 | 2.16581  |
| D <-> I | 0.039437  | 0.0570451 | 0.002249688 | 0.121543  | 0.017614 | 0.002140858 | 4.34   | 0.019 | 0.08246  |
| D <-> L | 0.0848047 | 0.0570451 | 0.004837693 | 0.121480  | 0.017614 | 0.002139749 | 1.9    | 0.019 | 0.0361   |
| D <-> K | 0.479855  | 0.0570451 | 0.027373376 | 1.950613  | 0.017614 | 0.034358097 | 2.31   | 0.019 | 0.04389  |
| D <-> M | 0.103754  | 0.0570451 | 0.005918657 | 0.433017  | 0.017614 | 0.007627161 | 1.9    | 0.019 | 0.0361   |
| D <-> F | 0.0467304 | 0.0570451 | 0.00266574  | 0.000017  | 0.017614 | 2.99438E-07 | 4.98   | 0.019 | 0.09462  |
| D <-> P | 0.423984  | 0.0570451 | 0.02418621  | 1.696885  | 0.017614 | 0.029888932 | 13.43  | 0.019 | 0.25517  |
| D <-> S | 1.07176   | 0.0570451 | 0.061138656 | 2.537370  | 0.017614 | 0.044693235 | 69.02  | 0.019 | 1.31138  |
| D <-> T | 0.374866  | 0.0570451 | 0.021384268 | 0.077584  | 0.017614 | 0.001366565 | 28.01  | 0.019 | 0.53219  |
| D <-> W | 0.129767  | 0.0570451 | 0.007402571 | 0.000017  | 0.017614 | 2.99438E-07 | 19.86  | 0.019 | 0.37734  |
| D <-> Y | 0.325711  | 0.0570451 | 0.018580217 | 1.295757  | 0.017614 | 0.022823464 | 21.21  | 0.019 | 0.40299  |
| D <-> V | 0.152335  | 0.0570451 | 0.008689965 | 0.000017  | 0.017614 | 2.99438E-07 | 1.9    | 0.019 | 0.0361   |
| C <-> Q | 0.0988179 | 0.0193078 | 0.001907956 | 0.000017  | 0.035297 | 6.00049E-07 | 75.24  | 0.006 | 0.45144  |
| C <-> E | 0.021352  | 0.0193078 | 0.00041226  | 0.000017  | 0.035297 | 6.00049E-07 | 1.9    | 0.006 | 0.0114   |
| C <-> G | 0.306674  | 0.0193078 | 0.0059212   | 4.163803  | 0.035297 | 0.146969754 | 30.71  | 0.006 | 0.18426  |
| C <-> H | 0.248972  | 0.0193078 | 0.004807102 | 2.234821  | 0.035297 | 0.078882477 | 141.49 | 0.006 | 0.84894  |
| C <-> I | 0.170135  | 0.0193078 | 0.003284933 | 2.660553  | 0.035297 | 0.093909539 | 62.73  | 0.006 | 0.37638  |
| C <-> L | 0.384287  | 0.0193078 | 0.007419737 | 1.033351  | 0.035297 | 0.03647419  | 25.65  | 0.006 | 0.1539   |
| C <-> K | 0.0740339 | 0.0193078 | 0.001429432 | 0.000017  | 0.035297 | 6.00049E-07 | 1.9    | 0.006 | 0.0114   |

|         |           |           |             |           |          |             |        |       |         |
|---------|-----------|-----------|-------------|-----------|----------|-------------|--------|-------|---------|
| C <-> M | 0.390482  | 0.0193078 | 0.007539348 | 1.374144  | 0.035297 | 0.048503161 | 6.18   | 0.006 | 0.03708 |
| C <-> F | 0.39802   | 0.0193078 | 0.007684891 | 4.337499  | 0.035297 | 0.153100702 | 70.8   | 0.006 | 0.4248  |
| C <-> P | 0.109404  | 0.0193078 | 0.002112351 | 0.000017  | 0.035297 | 6.00049E-07 | 31.26  | 0.006 | 0.18756 |
| C <-> S | 1.40766   | 0.0193078 | 0.027178818 | 11.039776 | 0.035297 | 0.389670973 | 277.05 | 0.006 | 1.6623  |
| C <-> T | 0.512984  | 0.0193078 | 0.009904592 | 4.559475  | 0.035297 | 0.160935789 | 179.97 | 0.006 | 1.07982 |
| C <-> W | 0.71707   | 0.0193078 | 0.013845044 | 1.540762  | 0.035297 | 0.054384276 | 33.6   | 0.006 | 0.2016  |
| C <-> Y | 0.543833  | 0.0193078 | 0.010500219 | 1.824575  | 0.035297 | 0.064402024 | 254.77 | 0.006 | 1.52862 |
| C <-> V | 1.00214   | 0.0193078 | 0.019349119 | 5.561946  | 0.035297 | 0.196320008 | 1.9    | 0.006 | 0.0114  |
| Q <-> E | 5.46947   | 0.0367281 | 0.200883241 | 35.682262 | 0.014995 | 0.535055519 | 313.56 | 0.025 | 7.839   |
| Q <-> G | 0.330052  | 0.0367281 | 0.012122183 | 4.111555  | 0.014995 | 0.061652767 | 6.75   | 0.025 | 0.16875 |
| Q <-> H | 4.29411   | 0.0367281 | 0.157714501 | 51.242334 | 0.014995 | 0.768378798 | 582.4  | 0.025 | 14.56   |
| Q <-> I | 0.113917  | 0.0367281 | 0.004183955 | 0.000017  | 0.014995 | 2.54915E-07 | 8.34   | 0.025 | 0.2085  |
| Q <-> L | 0.869489  | 0.0367281 | 0.031934679 | 0.819682  | 0.014995 | 0.012291132 | 39.7   | 0.025 | 0.9925  |
| Q <-> K | 3.8949    | 0.0367281 | 0.143052277 | 25.379126 | 0.014995 | 0.380559994 | 465.58 | 0.025 | 11.6395 |
| Q <-> M | 1.54526   | 0.0367281 | 0.056754464 | 4.755573  | 0.014995 | 0.071309817 | 47.37  | 0.025 | 1.18425 |
| Q <-> F | 0.0999208 | 0.0367281 | 0.003669901 | 0.090739  | 0.014995 | 0.001360631 | 19.11  | 0.025 | 0.47775 |
| Q <-> P | 0.933372  | 0.0367281 | 0.03428098  | 2.633334  | 0.014995 | 0.039486843 | 137.29 | 0.025 | 3.43225 |
| Q <-> S | 1.02887   | 0.0367281 | 0.03778844  | 4.048879  | 0.014995 | 0.060712941 | 54.11  | 0.025 | 1.35275 |
| Q <-> T | 0.857928  | 0.0367281 | 0.031510065 | 4.002151  | 0.014995 | 0.060012254 | 94.93  | 0.025 | 2.37325 |
| Q <-> W | 0.215737  | 0.0367281 | 0.00792361  | 0.546469  | 0.014995 | 0.008194303 | 1.9    | 0.025 | 0.0475  |
| Q <-> Y | 0.22771   | 0.0367281 | 0.008363356 | 0.180949  | 0.014995 | 0.00271333  | 38.82  | 0.025 | 0.9705  |
| Q <-> V | 0.301281  | 0.0367281 | 0.011065479 | 2.285398  | 0.014995 | 0.034269543 | 19     | 0.025 | 0.475   |
| E <-> G | 0.567717  | 0.0580589 | 0.032961025 | 2.182333  | 0.019375 | 0.042282702 | 28.28  | 0.024 | 0.67872 |

|         |           |           |             |          |          |             |        |       |         |
|---------|-----------|-----------|-------------|----------|----------|-------------|--------|-------|---------|
| E <-> H | 0.570025  | 0.0580589 | 0.033095024 | 6.273177 | 0.019375 | 0.121542804 | 49.12  | 0.024 | 1.17888 |
| E <-> I | 0.127395  | 0.0580589 | 0.007396414 | 0.411639 | 0.019375 | 0.007975506 | 3.31   | 0.024 | 0.07944 |
| E <-> L | 0.154263  | 0.0580589 | 0.00895634  | 0.000017 | 0.019375 | 3.29375E-07 | 1.9    | 0.024 | 0.0456  |
| E <-> K | 2.58443   | 0.0580589 | 0.150049163 | 5.413575 | 0.019375 | 0.104888016 | 313.86 | 0.024 | 7.53264 |
| E <-> M | 0.315124  | 0.0580589 | 0.018295753 | 2.270348 | 0.019375 | 0.043987993 | 1.9    | 0.024 | 0.0456  |
| E <-> F | 0.0811339 | 0.0580589 | 0.004710545 | 0.000017 | 0.019375 | 3.29375E-07 | 2.67   | 0.024 | 0.06408 |
| E <-> P | 0.682355  | 0.0580589 | 0.039616781 | 1.168452 | 0.019375 | 0.022638758 | 12.83  | 0.024 | 0.30792 |
| E <-> S | 0.704939  | 0.0580589 | 0.040927983 | 1.591212 | 0.019375 | 0.030829733 | 54.71  | 0.024 | 1.31304 |
| E <-> T | 0.822765  | 0.0580589 | 0.047768831 | 1.425746 | 0.019375 | 0.027623829 | 14.82  | 0.024 | 0.35568 |
| E <-> W | 0.156557  | 0.0580589 | 0.009089527 | 1.520005 | 0.019375 | 0.029450097 | 1.9    | 0.024 | 0.0456  |
| E <-> Y | 0.196303  | 0.0580589 | 0.011397136 | 0.808523 | 0.019375 | 0.015665133 | 13.12  | 0.024 | 0.31488 |
| E <-> V | 0.588731  | 0.0580589 | 0.034181074 | 0.998776 | 0.019375 | 0.019351285 | 21.14  | 0.024 | 0.50736 |
| G <-> H | 0.24941   | 0.0832518 | 0.020763831 | 0.000017 | 0.052284 | 8.88828E-07 | 1.9    | 0.056 | 0.1064  |
| G <-> I | 0.0304501 | 0.0832518 | 0.002535026 | 0.000017 | 0.052284 | 8.88828E-07 | 5.98   | 0.056 | 0.33488 |
| G <-> L | 0.0613037 | 0.0832518 | 0.005103643 | 1.801299 | 0.052284 | 0.094179117 | 2.41   | 0.056 | 0.13496 |
| G <-> K | 0.373558  | 0.0832518 | 0.031099376 | 0.752240 | 0.052284 | 0.039330116 | 22.73  | 0.056 | 1.27288 |
| G <-> M | 0.1741    | 0.0832518 | 0.014494138 | 0.764959 | 0.052284 | 0.039995116 | 1.9    | 0.056 | 0.1064  |
| G <-> F | 0.049931  | 0.0832518 | 0.004156846 | 0.747196 | 0.052284 | 0.039066396 | 1.9    | 0.056 | 0.1064  |
| G <-> P | 0.24357   | 0.0832518 | 0.020277641 | 0.395595 | 0.052284 | 0.020683289 | 1.9    | 0.056 | 0.1064  |
| G <-> S | 1.34182   | 0.0832518 | 0.11170893  | 4.378353 | 0.052284 | 0.228917808 | 125.93 | 0.056 | 7.05208 |
| G <-> T | 0.225833  | 0.0832518 | 0.018801004 | 1.784214 | 0.052284 | 0.093285845 | 11.17  | 0.056 | 0.62552 |
| G <-> W | 0.336983  | 0.0832518 | 0.028054441 | 0.965397 | 0.052284 | 0.050474817 | 10.92  | 0.056 | 0.61152 |
| G <-> Y | 0.103604  | 0.0832518 | 0.008625219 | 0.158693 | 0.052284 | 0.008297105 | 3.21   | 0.056 | 0.17976 |



|         |           |           |             |           |          |             |         |       |           |
|---------|-----------|-----------|-------------|-----------|----------|-------------|---------|-------|-----------|
| G <-> V | 0.187247  | 0.0832518 | 0.01558865  | 0.104953  | 0.052284 | 0.005487363 | 2.53    | 0.056 | 0.14168   |
| H <-> I | 0.13819   | 0.0244313 | 0.003376161 | 0.000017  | 0.013890 | 2.3613E-07  | 12.26   | 0.028 | 0.34328   |
| H <-> L | 0.499462  | 0.0244313 | 0.012202506 | 1.435801  | 0.013890 | 0.019943276 | 11.49   | 0.028 | 0.32172   |
| H <-> K | 0.890432  | 0.0244313 | 0.021754411 | 3.369225  | 0.013890 | 0.046798535 | 127.67  | 0.028 | 3.57476   |
| H <-> M | 0.404141  | 0.0244313 | 0.00987369  | 0.000017  | 0.013890 | 2.3613E-07  | 11.97   | 0.028 | 0.33516   |
| H <-> F | 0.679371  | 0.0244313 | 0.016597917 | 0.858364  | 0.013890 | 0.011922676 | 48.16   | 0.028 | 1.34848   |
| H <-> P | 0.696198  | 0.0244313 | 0.017009022 | 1.746018  | 0.013890 | 0.02425219  | 60.97   | 0.028 | 1.70716   |
| H <-> S | 0.740169  | 0.0244313 | 0.018083291 | 2.147079  | 0.013890 | 0.029822927 | 77.46   | 0.028 | 2.16888   |
| H <-> T | 0.473307  | 0.0244313 | 0.011563505 | 4.880825  | 0.013890 | 0.067794659 | 44.78   | 0.028 | 1.25384   |
| H <-> W | 0.262569  | 0.0244313 | 0.006414902 | 1.283476  | 0.013890 | 0.017827482 | 7.08    | 0.028 | 0.19824   |
| H <-> Y | 3.87344   | 0.0244313 | 0.094633175 | 18.232165 | 0.013890 | 0.253244772 | 670.14  | 0.028 | 18.76392  |
| H <-> V | 0.118358  | 0.0244313 | 0.00289164  | 0.538296  | 0.013890 | 0.007476931 | 1.9     | 0.028 | 0.0532    |
| I <-> L | 3.17097   | 0.048466  | 0.153684232 | 11.649315 | 0.104227 | 1.214173155 | 329.09  | 0.088 | 28.95992  |
| I <-> K | 0.323832  | 0.048466  | 0.015694842 | 0.000017  | 0.104227 | 1.77186E-06 | 19.57   | 0.088 | 1.72216   |
| I <-> M | 4.25746   | 0.048466  | 0.206342056 | 6.933572  | 0.104227 | 0.722665409 | 517.98  | 0.088 | 45.58224  |
| I <-> F | 1.05947   | 0.048466  | 0.051348273 | 2.657569  | 0.104227 | 0.276990444 | 84.67   | 0.088 | 7.45096   |
| I <-> P | 0.0999288 | 0.048466  | 0.004843149 | 0.342153  | 0.104227 | 0.035661581 | 20.63   | 0.088 | 1.81544   |
| I <-> S | 0.31944   | 0.048466  | 0.015481979 | 0.054045  | 0.104227 | 0.005632948 | 47.7    | 0.088 | 4.1976    |
| I <-> T | 1.45816   | 0.048466  | 0.070671183 | 3.274730  | 0.104227 | 0.341315284 | 368.43  | 0.088 | 32.42184  |
| I <-> W | 0.212483  | 0.048466  | 0.010298201 | 0.282943  | 0.104227 | 0.0294903   | 1.9     | 0.088 | 0.1672    |
| I <-> Y | 0.42017   | 0.048466  | 0.020363959 | 0.505561  | 0.104227 | 0.052693106 | 25.01   | 0.088 | 2.20088   |
| I <-> V | 7.8213    | 0.048466  | 0.379067126 | 25.958726 | 0.104227 | 2.705600135 | 1222.94 | 0.088 | 107.61872 |
| L <-> K | 0.257555  | 0.086209  | 0.022203559 | 0.000017  | 0.107297 | 1.82405E-06 | 14.88   | 0.169 | 2.51472   |

|         |          |           |             |           |          |             |        |       |          |
|---------|----------|-----------|-------------|-----------|----------|-------------|--------|-------|----------|
| L <-> M | 4.85402  | 0.086209  | 0.41846021  | 17.561533 | 0.107297 | 1.884299806 | 537.53 | 0.169 | 90.84257 |
| L <-> F | 2.11517  | 0.086209  | 0.182346691 | 9.513020  | 0.107297 | 1.020718507 | 216.06 | 0.169 | 36.51414 |
| L <-> P | 0.415844 | 0.086209  | 0.035849495 | 0.802655  | 0.107297 | 0.086122474 | 40.1   | 0.169 | 6.7769   |
| L <-> S | 0.344739 | 0.086209  | 0.029719604 | 0.363560  | 0.107297 | 0.039008897 | 73.61  | 0.169 | 12.44009 |
| L <-> T | 0.326622 | 0.086209  | 0.028157756 | 3.291709  | 0.107297 | 0.353190501 | 126.4  | 0.169 | 21.3616  |
| L <-> W | 0.665309 | 0.086209  | 0.057355624 | 1.506436  | 0.107297 | 0.161636063 | 32.44  | 0.169 | 5.48236  |
| L <-> Y | 0.398618 | 0.086209  | 0.034364459 | 0.504313  | 0.107297 | 0.054111272 | 44.15  | 0.169 | 7.46135  |
| L <-> V | 1.80034  | 0.086209  | 0.155205511 | 8.364695  | 0.107297 | 0.897506679 | 91.67  | 0.169 | 15.49223 |
| K <-> M | 0.934276 | 0.0620286 | 0.057951832 | 1.350050  | 0.037180 | 0.050194859 | 91.37  | 0.023 | 2.10151  |
| K <-> F | 0.088836 | 0.0620286 | 0.005510373 | 0.303948  | 0.037180 | 0.011300787 | 6.44   | 0.023 | 0.14812  |
| K <-> P | 0.556896 | 0.0620286 | 0.034543479 | 0.312545  | 0.037180 | 0.011620423 | 50.1   | 0.023 | 1.1523   |
| K <-> S | 0.96713  | 0.0620286 | 0.05998972  | 0.000017  | 0.037180 | 6.3206E-07  | 105.79 | 0.023 | 2.43317  |
| K <-> T | 1.38698  | 0.0620286 | 0.086032428 | 2.916861  | 0.037180 | 0.108448892 | 136.33 | 0.023 | 3.13559  |
| K <-> W | 0.137505 | 0.0620286 | 0.008529243 | 0.999162  | 0.037180 | 0.037148843 | 24     | 0.023 | 0.552    |
| K <-> Y | 0.133264 | 0.0620286 | 0.008266179 | 0.086881  | 0.037180 | 0.003230236 | 51.17  | 0.023 | 1.17691  |
| K <-> V | 0.305434 | 0.0620286 | 0.018945643 | 0.000017  | 0.037180 | 6.3206E-07  | 1.9    | 0.023 | 0.0437   |
| M <-> F | 1.19063  | 0.0195027 | 0.0232205   | 3.250092  | 0.036443 | 0.118443103 | 90.82  | 0.054 | 4.90428  |
| M <-> P | 0.171329 | 0.0195027 | 0.003341378 | 0.610211  | 0.036443 | 0.022237919 | 18.84  | 0.054 | 1.01736  |
| M <-> S | 0.493905 | 0.0195027 | 0.009632481 | 1.344576  | 0.036443 | 0.049000383 | 111.16 | 0.054 | 6.00264  |
| M <-> T | 1.51612  | 0.0195027 | 0.029568434 | 7.636555  | 0.036443 | 0.278298974 | 528.17 | 0.054 | 28.52118 |
| M <-> W | 0.515706 | 0.0195027 | 0.010057659 | 3.380240  | 0.036443 | 0.123186086 | 21.71  | 0.054 | 1.17234  |
| M <-> Y | 0.428437 | 0.0195027 | 0.008355678 | 0.506100  | 0.036443 | 0.018443802 | 39.96  | 0.054 | 2.15784  |
| M <-> V | 2.05845  | 0.0195027 | 0.040145333 | 6.104372  | 0.036443 | 0.222461629 | 387.54 | 0.054 | 20.92716 |

|         |          |           |             |           |          |             |        |       |          |
|---------|----------|-----------|-------------|-----------|----------|-------------|--------|-------|----------|
| F <-> P | 0.161444 | 0.0384319 | 0.0062046   | 0.130004  | 0.078440 | 0.010197514 | 17.31  | 0.061 | 1.05591  |
| F <-> S | 0.545931 | 0.0384319 | 0.020981166 | 1.505887  | 0.078440 | 0.118121776 | 64.29  | 0.061 | 3.92169  |
| F <-> T | 0.171903 | 0.0384319 | 0.006606559 | 1.890992  | 0.078440 | 0.148329412 | 33.85  | 0.061 | 2.06485  |
| F <-> W | 1.52964  | 0.0384319 | 0.058786972 | 5.505100  | 0.078440 | 0.431820044 | 7.84   | 0.061 | 0.47824  |
| F <-> Y | 6.45428  | 0.0384319 | 0.248050244 | 11.740286 | 0.078440 | 0.920908034 | 465.58 | 0.061 | 28.40038 |
| F <-> V | 0.649892 | 0.0384319 | 0.024976584 | 3.423294  | 0.078440 | 0.268523181 | 6.35   | 0.061 | 0.38735  |
| P <-> S | 1.61328  | 0.0457631 | 0.073828694 | 1.796229  | 0.042829 | 0.076930692 | 169.9  | 0.054 | 9.1746   |
| P <-> T | 0.795384 | 0.0457631 | 0.036399238 | 1.927018  | 0.042829 | 0.082532254 | 128.22 | 0.054 | 6.92388  |
| P <-> W | 0.139405 | 0.0457631 | 0.006379605 | 0.421593  | 0.042829 | 0.018056407 | 4.21   | 0.054 | 0.22734  |
| P <-> Y | 0.216046 | 0.0457631 | 0.009886935 | 0.520846  | 0.042829 | 0.022307313 | 16.21  | 0.054 | 0.87534  |
| P <-> V | 0.314887 | 0.0457631 | 0.014410205 | 0.075829  | 0.042829 | 0.00324768  | 8.23   | 0.054 | 0.44442  |
| S <-> T | 4.37802  | 0.0695179 | 0.304350757 | 22.576963 | 0.063663 | 1.437317195 | 597.21 | 0.072 | 42.99912 |
| S <-> W | 0.523742 | 0.0695179 | 0.036409444 | 0.000017  | 0.063663 | 1.08227E-06 | 38.58  | 0.072 | 2.77776  |
| S <-> Y | 0.786993 | 0.0695179 | 0.054710101 | 0.576053  | 0.063663 | 0.036673262 | 64.92  | 0.072 | 4.67424  |
| S <-> V | 0.232739 | 0.0695179 | 0.016179527 | 0.817618  | 0.063663 | 0.052052015 | 1.9    | 0.072 | 0.1368   |
| T <-> W | 0.110864 | 0.0610127 | 0.006764112 | 0.451270  | 0.058465 | 0.026383501 | 9.99   | 0.086 | 0.85914  |
| T <-> Y | 0.291148 | 0.0610127 | 0.017763726 | 0.408951  | 0.058465 | 0.02390932  | 38.73  | 0.086 | 3.33078  |
| T <-> V | 1.38823  | 0.0610127 | 0.084699661 | 7.891488  | 0.058465 | 0.461375846 | 204.54 | 0.086 | 17.59044 |
| W <-> Y | 2.48539  | 0.0143859 | 0.035754572 | 6.765614  | 0.021135 | 0.142991252 | 26.25  | 0.029 | 0.76125  |
| W <-> V | 0.365369 | 0.0143859 | 0.005256162 | 0.063870  | 0.021135 | 0.001349892 | 5.37   | 0.029 | 0.15573  |
| Y <-> V | 0.31473  | 0.0352742 | 0.011101849 | 1.000000  | 0.054331 | 0.054331    | 1.9    | 0.033 | 0.0627   |

**Supplementary Table S3:** Model selection. : This analysis illustrate that data set specific GTR+ $\Gamma$  models fits each of our data set better than precomputed GTR mode

|                      | Data set                           | Model          | log-likelihood | AIC         |
|----------------------|------------------------------------|----------------|----------------|-------------|
|                      | GPCR & Opsin<br>Master alignment   | GTR+ $\Gamma$  | -78625.11026   | 157672.2205 |
|                      |                                    | LGF+ $\Gamma$  | -79573.94395   | 159149.8879 |
|                      |                                    | WAGF+ $\Gamma$ | -79929.86067   | 159861.7231 |
| Part A.<br>AIC tests | Opsins &<br>Outgroups<br>alignment | GTR+ $\Gamma$  | -33759.69164   | 67941.38327 |
|                      |                                    | LGF+ $\Gamma$  | -34197.46653   | 68393.93306 |
|                      |                                    | WAGF+ $\Gamma$ | -34414.51953   | 68831.03907 |
|                      | All Opsin Master<br>alignment      | GTR+ $\Gamma$  | -78875.35627   | 158172.7125 |
|                      |                                    | LGF+ $\Gamma$  | -79821.76843   | 159625.5369 |
|                      |                                    | WAGF+ $\Gamma$ | -80417.84551   | 160837.691  |

**Supplementary Table S4:** Bayesian cross validation. This analysis was performed to compare the GTR+ $\Gamma$  models against precomputed site heterogeneous (CAT) models. The All Opsin Master alignment was not tested because of computational limitations. Note: In the cross validation a negative value implies that the reference model (GTR+ $\Gamma$ ) is better than the tested model. Only in the case of O&O one of the heterogeneous models (C50) performs marginally better than GTR. However, for all considered models (including C50) the standard deviation around the cross validation scores is too large to claim that one of the two models fits the data better. As none of the precomputed empirical CAT models was found to fit the data significantly better than GTR+ $\Gamma$ , these models were not used to analyse the data.

|                                | Data set | Compared Models  | Mean Score | Stdev (+/-) |
|--------------------------------|----------|------------------|------------|-------------|
| Part B.<br>Cross<br>Validation | G&OM     | C20 versus GTR   | -458.095   | 1412.83     |
|                                |          | C30 versus GTR   | -263.715   | 1271.08     |
|                                |          | C40 versus GTR   | -868.692   | 1100.33     |
|                                |          | C50 versus GTR   | -394.801   | 1335.45     |
|                                |          | C60 versus GTR   | -615.158   | 1212.5      |
|                                |          | UL3 versus GTR   | -344.796   | 1110.3      |
|                                |          | WLSR5 versus GTR | -575.617   | 1480.18     |
|                                | O&O      | C20 versus GTR   | -440.047   | 543.972     |
|                                |          | C30 versus GTR   | -149.996   | 769.156     |
|                                |          | C40 versus GTR   | -390.47    | 373.572     |
|                                |          | C50 versus GTR   | 107.343    | 608.496     |
|                                |          | C60 versus GTR   | -135.062   | 470.151     |
|                                |          | UL3 versus GTR   | -151.482   | 587.579     |
|                                |          | WLSR5 versus GTR | -209.752   | 482.316     |

**Supplementary Table S5:** Posterior predictive analysis for compositional homogeneity. Stars identify compositional heterogeneous sequences.

| taxon            | p-value | z-score |
|------------------|---------|---------|
| Plos1_4_8-130    | 0.778   | -0.895  |
| NV_CN144Suga08   | 0.677   | -0.525  |
| NV_CN139Suga08   | 0.429   | 0.004   |
| NV_CN145Suga08   | 0.402   | 0.098   |
| NV_CN135_Suga0   | 0.543   | -0.205  |
| NV_CN143Suga08   | 0.59    | -0.314  |
| NV_CN138Suga08   | 0.597   | -0.412  |
| NV_CN136Suga20   | 0.503   | -0.166  |
| * NV_CN140Suga08 | 0.046   | 1.94    |
| * NV_CN141Suga08 | 0.006   | 3.95    |
| * NV_CN148Suga08 | 0.006   | 3.927   |
| NV_CN149Suga08   | 0.127   | 1.301   |
| NV_CN150Suga08   | 0.12    | 1.383   |
| NV_CN142Suga08   | 0.181   | 0.871   |
| NV_CN137Suga08   | 0.771   | -0.76   |
| OG43AnogaT       | 0.832   | -0.962  |
| 038InsCuqu       | 0.657   | -0.536  |
| OG44AnogaT       | 0.63    | -0.434  |
| OG46RhoprT       | 0.147   | 0.836   |
| OG47TricaT       | 0.073   | 1.598   |
| OG48AcypiT       | 0.59    | -0.365  |
| OG45ApimeT       | 0.067   | 1.519   |
| OG49DappuT       | 0.892   | -1.062  |
| OG50DappuT       | 0.308   | 0.351   |

|              |       |        |
|--------------|-------|--------|
| 014PerBota   | 0.489 | -0.149 |
| 015PerCafa   | 0.557 | -0.331 |
| 016PerHosa   | 0.328 | 0.299  |
| 017PerRano   | 0.57  | -0.356 |
| 018PerMumu   | 0.926 | -1.339 |
| 019PerDare   | 0.563 | -0.333 |
| 020PerGaga   | 0.12  | 1.181  |
| CR_CN100_K   | 0.234 | 0.585  |
| CIR_CN101S   | 0.214 | 0.532  |
| CIR_CN128S   | 0.234 | 0.519  |
| CIR_CN102S   | 0.255 | 0.507  |
| CIR_CN127S   | 0.255 | 0.497  |
| * CIR_CN103S | 0.013 | 3.685  |
| * CIR_CN125S | 0.013 | 3.632  |
| CIR_CN104S   | 0.174 | 0.834  |
| CIR_CN126S   | 0.181 | 0.825  |
| CIR_CN105S   | 0.308 | 0.347  |
| CIR_CN116S   | 0.308 | 0.343  |
| CIR_CN106S   | 0.073 | 1.602  |
| CIR_CN107S   | 0.08  | 1.628  |
| CL_CN168_A   | 0.073 | 1.54   |
| CIR_CN108S   | 0.08  | 1.544  |
| CIR_CN115S   | 0.08  | 1.548  |
| * CIR_CN113S | 0.02  | 2.599  |
| CIR_CN109S   | 0.993 | -1.773 |
| CIR_CN114S   | 0.986 | -1.611 |
| CIR_CN112S   | 0.523 | -0.238 |
| CIR_CN119S   | 0.993 | -1.735 |
| CIR_CN117S   | 0.61  | -0.452 |

|              |       |        |
|--------------|-------|--------|
| CIR_CN118S   | 0.812 | -0.778 |
| CIR_CN110S   | 0.651 | -0.523 |
| CIR_CN111S   | 0.624 | -0.424 |
| CIR_CN124S   | 0.456 | -0.132 |
| CIR_CN123S   | 0.348 | 0.208  |
| CIR_CN120S   | 0.785 | -0.812 |
| CIR_CN121S   | 0.932 | -1.169 |
| CIR_CN122S   | 0.395 | 0.042  |
| HM_CN131_2   | 0.093 | 1.511  |
| HM_CN132_2   | 0.107 | 1.234  |
| HM_CNOK_CN   | 0.389 | 0.109  |
| HM_CN133_2   | 0.08  | 1.632  |
| PC_CN165Su   | 0.073 | 1.365  |
| * PC_CN130_O | 0     | 3.418  |
| * HM_CN170_U | 0     | 3.394  |
| * HM_CNOK_CV | 0.04  | 1.807  |
| PC_CN166Su   | 0.087 | 1.704  |
| * HM_CN134_2 | 0.046 | 1.888  |
| NV_CN147Su   | 0.228 | 0.628  |
| NV_CN157Su   | 0.214 | 0.695  |
| Plos1_2_1-   | 0.194 | 0.798  |
| NV_CN155Su   | 0.55  | -0.309 |
| Plos1_3_2-   | 0.51  | -0.112 |
| NV_CN156Su   | 0.825 | -1.005 |
| Plos1_1_1-   | 0.838 | -0.996 |
| NV_CN154Su   | 0.563 | -0.189 |
| NV_CN152Su   | 0.302 | 0.246  |
| NV_CN153Su   | 0.281 | 0.244  |
| * NV_CN159Su | 0.013 | 2.603  |



|                |       |        |
|----------------|-------|--------|
| NV_CN158Su     | 0.174 | 0.847  |
| NV_CN160Su     | 0.201 | 0.681  |
| NV_CN164Su     | 0.248 | 0.547  |
| * NV_CN161Su   | 0.02  | 2.215  |
| * NV_CN162Su   | 0.006 | 3.318  |
| * NV_CN163Su   | 0.006 | 3.299  |
| NV_CN136Su     | 0.087 | 1.309  |
| NV_CN151Su     | 0.382 | 0.17   |
| NV_CN146Su     | 0.053 | 1.765  |
| * 231OPSBrebe_ | 0.046 | 1.979  |
| 232TMTTagu_    | 0.107 | 1.311  |
| 233TMTDare_    | 0.429 | -0.001 |
| 234TMTTaru_    | 0.114 | 1.263  |
| 227EncHepu_    | 0.295 | 0.392  |
| 001PapglRE_    | 0.838 | -1.021 |
| 002PieraRE_    | 0.778 | -0.886 |
| 003DanplRE_    | 0.59  | -0.399 |
| 004HelerRE_    | 0.912 | -1.055 |
| 013ApomoRE_    | 1     | -1.727 |
| 005PapglRE_    | 0.604 | -0.323 |
| 006PapglRE_    | 0.302 | 0.482  |
| 007ManseRE_    | 0.758 | -0.666 |
| 009BommoRE_    | 0.637 | -0.37  |
| 008BommoRE_    | 0.536 | -0.221 |
| 010PapglRE_    | 0.926 | -1.15  |
| 011ApomoRE_    | 0.442 | -0.036 |
| 012LycruRE_    | 0.161 | 1.063  |
| 014SchgrRE_    | 0.671 | -0.531 |
| 186LocmiRE_    | 0.697 | -0.666 |

|             |       |        |
|-------------|-------|--------|
| 015SphspRE_ | 0.899 | -1.039 |
| 033DianiRE_ | 0.771 | -0.837 |
| 192RhoprRE_ | 0.657 | -0.395 |
| 018TricaRE_ | 0.993 | -1.946 |
| 179LucrRE_  | 0.912 | -1.127 |
| 019ThemaRE_ | 0.872 | -1.03  |
| 016OncniHE_ | 0.912 | -1.239 |
| 017HomcoHE_ | 0.932 | -1.249 |
| 020CamabRE_ | 0.677 | -0.368 |
| 021CatboRE_ | 0.617 | -0.347 |
| 022AthroRE_ | 0.959 | -1.303 |
| 023ApimeRE_ | 0.677 | -0.526 |
| 024NasviRE_ | 0.704 | -0.543 |
| 185PedhuRE_ | 0.369 | 0.3    |
| 025AnogaRE_ | 0.463 | -0.11  |
| 026AnogaRE_ | 0.469 | -0.115 |
| 028AedaeRE_ | 0.395 | 0.072  |
| 029AedaeRE_ | 0.637 | -0.412 |
| 030CulpiRE_ | 0.657 | -0.533 |
| 031CulpiRE_ | 0.671 | -0.603 |
| 027AnogaRE_ | 0.711 | -0.739 |
| 032AedaeRE_ | 0.791 | -0.898 |
| 035CulpiRE_ | 0.973 | -1.402 |
| 034AedaeRE_ | 0.899 | -1.082 |
| 037CulpiRE_ | 0.879 | -1.09  |
| 036CulpiRE_ | 0.355 | 0.254  |
| 038CulpiRE_ | 0.758 | -0.782 |
| 045AnogaRE_ | 0.563 | -0.257 |
| 039AcypiRE_ | 0.637 | -0.48  |

|              |       |        |
|--------------|-------|--------|
| 040MegviRE_  | 0.691 | -0.645 |
| 041AnogaRE_  | 0.738 | -0.674 |
| 042CulpiRE_  | 0.369 | 0.223  |
| 043AedaeRE_  | 0.187 | 0.813  |
| 044ApimeOC_  | 0.919 | -1.099 |
| 190NasviOC_  | 0.496 | -0.102 |
| 076CalviOC_  | 0.161 | 0.936  |
| 078DromeOC_  | 0.375 | 0.252  |
| 079BacdoOC_  | 0.617 | -0.47  |
| 077DromeOC_  | 0.604 | -0.459 |
| 069LimpoLW_  | 0.409 | 0.048  |
| 070LimpoLW_  | 0.51  | -0.218 |
| 071PlepaLW_  | 0.778 | -0.789 |
| 072HasadLW_  | 0.543 | -0.21  |
| 073IxoscLW_  | 0.228 | 0.728  |
| 074PlepaLW_  | 0.624 | -0.433 |
| 075HasadLW_  | 0.677 | -0.565 |
| 048PromiL1_  | 0.617 | -0.449 |
| 049ProciL1_  | 0.597 | -0.461 |
| 050OrcauL1_  | 0.463 | -0.045 |
| 051CamluL1_  | 0.724 | -0.652 |
| 052CamshL1_  | 0.832 | -0.908 |
| 055NeoamL1_  | 0.557 | -0.309 |
| 058PetcilL1_ | 0.214 | 0.73   |
| 056HolcoL1_  | 0.496 | -0.205 |
| 057LitvaL1_  | 0.704 | -0.595 |
| 060EupsuL1_  | 0.248 | 0.62   |
| 061ArcgrL1_  | 0.557 | -0.202 |
| 063GampuL1_  | 0.865 | -1.066 |

|               |       |        |
|---------------|-------|--------|
| 064GampuL1_   | 0.986 | -1.821 |
| 194EurpuL1_   | 0.228 | 0.725  |
| 195NeoinL1_   | 0.489 | -0.156 |
| 196NeoinL1_   | 0.355 | 0.376  |
| 197NeoinL1_   | 0.604 | -0.356 |
| 198NeoinL1_   | 0.624 | -0.4   |
| 053NeooeL1_   | 0.932 | -1.37  |
| 054NeooeL1_   | 0.885 | -1.103 |
| 204NeooeL1_   | 0.892 | -1.146 |
| 206NeooeL1_   | 0.302 | 0.466  |
| * 207NeooeL1_ | 0.033 | 2.105  |
| 205NeooeL1_   | 0.973 | -1.567 |
| 059HomgaL1_   | 0.624 | -0.431 |
| 065ParbaL1_   | 0.986 | -1.46  |
| 066CasknL1_   | 0.771 | -0.747 |
| 067MysdiL1_   | 0.738 | -0.676 |
| 068HemanL1_   | 0.214 | 0.563  |
| 062NeooeL1_   | 0.832 | -0.93  |
| 201NeooeL1_   | 0.61  | -0.454 |
| 102PetcilL1_  | 0.154 | 1.05   |
| 202NeooeL1_   | 0.718 | -0.612 |
| 203NeooeL1_   | 0.342 | 0.127  |
| 080DappuM1_   | 0.785 | -0.83  |
| 081DappuM1_   | 0.892 | -1.154 |
| 082DappuM1_   | 0.872 | -1.064 |
| 083DappuM1_   | 0.604 | -0.329 |
| 084DappuM1_   | 0.342 | 0.246  |
| 085DappuM1_   | 0.845 | -0.978 |
| 086DappuM1_   | 0.993 | -1.726 |

|             |       |        |
|-------------|-------|--------|
| 087DappuM1_ | 0.939 | -1.21  |
| 088DappuM1_ | 0.953 | -1.29  |
| 089DappuM1_ | 0.953 | -1.228 |
| 163BrakuM1_ | 0.939 | -1.325 |
| 166BrakuM1_ | 0.852 | -1.003 |
| 168BrakuM1_ | 0.892 | -1.037 |
| 167BrakuM1_ | 0.812 | -0.944 |
| 165BrakuM1_ | 1     | -1.742 |
| 174TrigrM1_ | 0.335 | 0.277  |
| 171TriloM1_ | 0.919 | -1.354 |
| 175TrigrM1_ | 0.926 | -1.342 |
| 173TrigrM1_ | 0.449 | -0.05  |
| 090DappuM2_ | 0.684 | -0.499 |
| 091DappuM2_ | 0.436 | 0.069  |
| 092DappuM2_ | 0.644 | -0.457 |
| 093DappuM2_ | 0.798 | -0.858 |
| 094DappuM2_ | 0.597 | -0.584 |
| 095DappuM2_ | 0.429 | 0.068  |
| 096DappuM2_ | 0.617 | -0.519 |
| 172TriloM2_ | 0.892 | -1.026 |
| 176TrigrM2_ | 0.959 | -1.318 |
| 097PorpeM2_ | 0.147 | 0.978  |
| 098HemsaM2_ | 0.778 | -0.814 |
| 178UcavoM2_ | 0.818 | -0.842 |
| 099HemsaM2_ | 0.63  | -0.431 |
| 177UcavoM2_ | 0.469 | -0.107 |
| 100PetcM2_  | 0.577 | -0.269 |
| 101PetcM2_  | 0.577 | -0.322 |
| 193EurpuM2_ | 0.926 | -1.347 |

|               |       |        |
|---------------|-------|--------|
| 208LimpoMW_   | 0.496 | -0.158 |
| 103AedaeUV_   | 0.697 | -0.646 |
| 104CulpiUV_   | 0.932 | -1.237 |
| 105AnogaUV_   | 0.53  | -0.311 |
| 106TricaUV_   | 0.664 | -0.55  |
| 180LuccrUV_   | 0.912 | -1.321 |
| * 181ThemaUV_ | 0.04  | 2.312  |
| 182ThemaUV_   | 0.899 | -1.226 |
| 108ApimeUV_   | 0.476 | -0.041 |
| 109BomimUV_   | 0.697 | -0.591 |
| 110CatboUV_   | 0.664 | -0.465 |
| 111CamabUV_   | 0.724 | -0.63  |
| 112NasviUV_   | 0.899 | -1.161 |
| 107DianiUV_   | 0.852 | -0.914 |
| 189LaukoUV_   | 0.993 | -1.627 |
| 191RhoprUV_   | 0.476 | -0.169 |
| 113CalviUV_   | 0.167 | 0.895  |
| 114DromeUV_   | 0.053 | 1.742  |
| 115DromeUV_   | 0.879 | -1.035 |
| 116ApomoUV_   | 0.724 | -0.672 |
| 117LycruUV_   | 0.657 | -0.533 |
| 118DanplUV_   | 0.926 | -1.315 |
| 119HelerUV_   | 0.859 | -1.048 |
| 120PieraUV_   | 0.718 | -0.675 |
| 121ManseUV_   | 1     | -1.728 |
| 123BommoUV_   | 0.812 | -0.89  |
| 122PapglUV_   | 0.919 | -1.212 |
| 145AcypiUV_   | 0.859 | -1.051 |
| 146MegviUV_   | 0.859 | -1.019 |

|             |       |        |
|-------------|-------|--------|
| 147AcypiUV_ | 0.61  | -0.318 |
| 183PedhuUV_ | 0.375 | 0.128  |
| 144BrakuU1_ | 0.845 | -0.994 |
| 148TriloU1_ | 0.651 | -0.53  |
| 149TrigrU1_ | 0.724 | -0.693 |
| 151DappuU1_ | 0.939 | -1.08  |
| 150DappuU1_ | 0.872 | -0.998 |
| 124ManseBL_ | 0.671 | -0.576 |
| 133BommoBL_ | 0.711 | -0.752 |
| 125PapglBL_ | 0.624 | -0.404 |
| 126DanplBL_ | 0.859 | -0.984 |
| 127HelerBL_ | 0.979 | -1.569 |
| 128ApomoBL_ | 0.744 | -0.662 |
| 129LycruBL_ | 0.241 | 0.415  |
| 130LycruBL_ | 0.859 | -1.028 |
| 131PieraBL_ | 0.53  | -0.196 |
| 132PieraBL_ | 0.389 | 0.064  |
| 134CulpiBL_ | 0.926 | -1.201 |
| 135CulpiBL_ | 0.557 | -0.219 |
| 136AnogaBL_ | 0.718 | -0.599 |
| 137AedaeBL_ | 0.919 | -1.28  |
| 140ApimeBL_ | 0.308 | 0.323  |
| 141NasviBL_ | 0.711 | -0.599 |
| 138SchgrBL_ | 0.355 | 0.042  |
| 139DianiBL_ | 0.785 | -0.754 |
| 187LaukoBL_ | 0.221 | 0.558  |
| 152PlepaUW_ | 0.348 | 0.217  |
| 153HasadUW_ | 0.711 | -0.721 |
| 154AedaeR7_ | 0.563 | -0.376 |

|               |       |        |
|---------------|-------|--------|
| 155CulpiR7_   | 0.744 | -0.779 |
| 156AnogaR7_   | 0.107 | 1.348  |
| 157DromeR7_   | 0.355 | 0.2    |
| 158BommoR7_   | 0.087 | 1.478  |
| 159AcypiR7_   | 0.812 | -0.848 |
| 160AcypiR7_   | 0.778 | -0.734 |
| 184PedhuR7_   | 0.818 | -1.02  |
| 199RhoprR7_   | 0.724 | -0.765 |
| * 161DappuR7_ | 0     | 3.501  |
| 162DappuR7_   | 0.825 | -0.862 |
| * 200IxoscR7_ | 0     | 7.35   |
| OG1LoligoP_   | 0.241 | 0.527  |
| OG2Sepia2P_   | 0.295 | 0.422  |
| OG3TodaroP_   | 0.255 | 0.63   |
| OG14EupryP_   | 0.281 | 0.494  |
| OG4OctopuP_   | 0.147 | 1.188  |
| OG5LottiaP_   | 0.644 | -0.521 |
| OG6PatinoP_   | 0.174 | 0.788  |
| OG7PlatynP_   | 0.389 | 0.191  |
| OG8CapiteP_   | 0.147 | 1.171  |
| OG10HelobP_   | 0.798 | -0.945 |
| OG11HelobP_   | 0.885 | -1.106 |
| OG12HelobP_   | 0.691 | -0.591 |
| OG13HelobP_   | 0.885 | -1.082 |
| OG9SchmaMP_   | 0.738 | -0.64  |
| OG19SchmiP_   | 0.234 | 0.813  |
| OG17SchmaP_   | 0.389 | 0.185  |
| OG18SchimP_   | 0.456 | -0.042 |
| OG41BraflM_   | 1     | -1.679 |



|             |       |        |
|-------------|-------|--------|
| OG42BraflM_ | 1     | -1.79  |
| 237MelFeca_ | 0.483 | -0.04  |
| OG23BostaM_ | 0.563 | -0.277 |
| OG21HomspM_ | 0.342 | 0.265  |
| OG22PanpaM_ | 0.328 | 0.265  |
| OG24MusmuM_ | 0.845 | -0.96  |
| OG25MondoM_ | 0.248 | 0.619  |
| OG26GalgaM_ | 0.51  | -0.203 |
| OG27TakruM_ | 0.577 | -0.359 |
| OG28OrylaM_ | 0.161 | 0.945  |
| OG29DanreM_ | 0.604 | -0.37  |
| OG30DanreM_ | 0.375 | 0.075  |
| OG31OrylaM_ | 0.295 | 0.337  |
| OG34GalgaD_ | 0.147 | 0.844  |
| OG35XenlaD_ | 0.067 | 1.535  |
| OG36TakruD_ | 0.308 | 0.403  |
| OG37OrylaD_ | 0.476 | -0.156 |
| OG38DanreD_ | 0.154 | 0.939  |
| OG39TakruD_ | 0.067 | 1.905  |
| OG40OrylaD_ | 0.174 | 1.106  |
| 021NeuDare_ | 0.194 | 0.731  |
| 022NeuTagu_ | 0.395 | 0.096  |
| 023NeuGaga_ | 0.248 | 0.67   |
| 024NeuMumu_ | 0.604 | -0.39  |
| 025NeuRano_ | 0.704 | -0.612 |
| 026NeuBota_ | 0.55  | -0.197 |
| 027NeuPatr_ | 0.671 | -0.496 |
| 028NeuHosa_ | 0.671 | -0.472 |
| 029NeuCafa_ | 0.617 | -0.313 |

|               |       |        |
|---------------|-------|--------|
| 030NeuEqca_   | 0.637 | -0.35  |
| 031NeuOran_   | 0.677 | -0.46  |
| 032NeuModo_   | 0.704 | -0.569 |
| 226OpsPldu_   | 0.248 | 0.636  |
| 228EncDare_   | 0.241 | 0.616  |
| 229EncHosa_   | 0.08  | 1.636  |
| 230EncMumu_   | 0.08  | 1.294  |
| * 006RGRCafa_ | 0.006 | 4.086  |
| * 007RGRBota_ | 0.006 | 4.131  |
| * 008RGRPatr_ | 0.04  | 2.036  |
| * 009RGRHosa_ | 0.02  | 2.202  |
| 010RGRDare_   | 0.724 | -0.725 |
| 011hypXetr_   | 0.442 | 0.123  |
| 012RGRGaga_   | 0.583 | -0.389 |
| 040ParUtst_   | 0.241 | 0.57   |
| 041ParXetr_   | 0.214 | 0.632  |
| 042OpsCiin_   | 0.261 | 0.573  |
| 047PinPema_   | 0.053 | 1.662  |
| 048VAoXela_   | 0.959 | -1.552 |
| 049VAoGaga_   | 1     | -1.796 |
| 052VAoOrla_   | 0.51  | -0.126 |
| 053VAoCyca_   | 0.194 | 0.712  |
| 054VAoDare_   | 0.456 | -0.069 |
| 055LWSCami_   | 0.322 | 0.248  |
| 057OpsPhma_   | 0.563 | -0.346 |
| 058LWSLeja_   | 0.872 | -1.031 |
| 059LWSGeau_   | 0.791 | -0.747 |
| 117SWSLoaf_   | 0.12  | 1.103  |
| * 118SWSPtpu_ | 0.04  | 2.361  |

|               |       |        |
|---------------|-------|--------|
| 120UVoCaau_   | 0.442 | -0.015 |
| 121UVoCyca_   | 0.241 | 0.51   |
| 122SWSDare_   | 0.268 | 0.468  |
| 125SWSSasa_   | 0.463 | -0.041 |
| 126SWSORla_   | 0.208 | 0.603  |
| 128SWSPore_   | 0.181 | 0.733  |
| 130GreDare_   | 0.06  | 1.707  |
| 131GreCaau_   | 0.255 | 0.576  |
| 132GreCyca_   | 0.295 | 0.354  |
| 135SWSORla_   | 0.563 | -0.209 |
| 136RH2Orla_   | 0.073 | 1.61   |
| 137GreTeni_   | 0.268 | 0.491  |
| 138GreTaru_   | 0.12  | 1.394  |
| 142OpsPhma_   | 0.214 | 0.736  |
| 143RH2Lach_   | 0.852 | -0.955 |
| 144RH2Nefo_   | 0.496 | -0.23  |
| 145RH2Anca_   | 0.798 | -0.809 |
| 146RH2Tagu_   | 0.63  | -0.448 |
| 147GreAnpl_   | 0.255 | 0.466  |
| * 148RHOGaga_ | 0.046 | 1.646  |
| 143RH2Geau_   | 0.12  | 1.183  |
| 149RodSasa_   | 0.315 | 0.382  |
| 151RodTaru_   | 0.496 | -0.168 |
| 150ExoDare_   | 0.268 | 0.573  |
| 153RhAGeau_   | 0.181 | 0.825  |
| * 154RHOPema_ | 0.046 | 1.816  |
| 155RHOLEja_   | 0.14  | 1.251  |
| 156RHOLEja_   | 0.134 | 1.28   |
| 159RHOLEer_   | 0.114 | 1.162  |

|               |       |        |
|---------------|-------|--------|
| 160RHOScca_   | 0.208 | 0.735  |
| 161RHOCami_   | 0.08  | 1.709  |
| 162RHOPyre_   | 0.208 | 0.715  |
| 163RHOOAnpl_  | 0.181 | 0.802  |
| 164RHOGaga_   | 0.181 | 0.809  |
| 165RHOTagu_   | 0.355 | 0.161  |
| * 177OpsCypy_ | 0.033 | 2.169  |
| 166RHOOran_   | 0.335 | 0.275  |
| 167RHOBota_   | 0.14  | 0.961  |
| 168RHOCapo_   | 0.308 | 0.471  |
| 170RHOOrcu_   | 0.489 | -0.143 |
| 171RHOHosa_   | 0.577 | -0.313 |
| 172RHORano_   | 0.194 | 0.674  |
| 173RHOMumu_   | 0.268 | 0.555  |
| 175RHOFeca_   | 0.268 | 0.492  |
| 176RHOCafa_   | 0.409 | 0.11   |
| 174RHOMylu_   | 0.402 | 0.125  |
| 169RHOSusc_   | 0.59  | -0.283 |
| 158RHOSasa_   | 0.597 | -0.476 |
| 193RHOTaru_   | 0.422 | -0.02  |
| 194RHOPore_   | 0.275 | 0.403  |
| 195RHOOrla_   | 0.187 | 0.968  |
| 196RH1Anan_   | 0.187 | 0.713  |
| * 199RHOCyca_ | 0.04  | 2.15   |
| 200RHODare_   | 0.1   | 1.391  |
| 201BluGeau_   | 0.953 | -1.348 |
| 210BluCyca_   | 0.979 | -1.585 |
| 211SWSDare_   | 0.791 | -0.83  |
| 212SWSSasa_   | 0.241 | 0.533  |

|                |       |        |
|----------------|-------|--------|
| 215SWSLugo_    | 0.463 | -0.048 |
| 224SWSOrla_    | 0.067 | 1.623  |
| 217BluTaru_    | 0.255 | 0.463  |
| * 218suppTeni_ | 0.04  | 2.131  |
| 219SWSOrla_    | 0.127 | 0.987  |
| 220SWSLugo_    | 0.469 | -0.148 |
| 202OpsCypy_    | 0.919 | -1.181 |
| 203OpsRaca_    | 0.979 | -1.475 |
| 204SWSNefo_    | 0.275 | 0.471  |
| 205BluGaga_    | 0.114 | 1.125  |
| 208SWSTagu_    | 0.201 | 0.781  |
| 209SWSAnca_    | 0.073 | 1.6    |
| 206SWSOran_    | 0.812 | -0.884 |
| 207SWSTaac_    | 0.516 | -0.162 |
| * 043suppTeni_ | 0.006 | 2.774  |
| * 044ParLeja_  | 0.013 | 3.36   |
| 045ParIcpu_    | 0.248 | 0.538  |
| 046ParOnmy_    | 0.08  | 1.649  |

global test:

succeeded

observed : 0.0240564

mean pred : 0.0183843

p-value : 0.154362

z-score : 1.05464

## Figure Captions:

**Figure Supplementary 1: Alternative hypotheses of opsin relationships. (A)** The phylogeny of (9). In this tree the cnidarian-specific opsins form two groups. One represent the sister group of the C-opsins and includes only one sequence. The second represent the sister group of the R- plus Go/RGR-opsins. This phylogeny can be explained with two duplications only. The first duplication happened in the stem neuralian lineage and separated the C-opsin lineage from the Cnidopsin, plus R, plus Go/RGR lineage. The second duplication happened in the stem bilaterian lineage and separated the R- from the Go/RGR-opsins. **(B)** The phylogeny of (12). In this hypothesis the cnidarian specific opsins are split into three groups. These represent the sister group of the C-opsins, of the R-opsins and of all the other opsins. In (12) these cnidarian-specific opsins were referred to as: Group 1, Group 2 and Group 3, respectively (see Figure 1b). To explain the opsin distribution in Fig. 1b three duplications and two deletions are necessary. The first duplication separates the Group 3 opsins from all the other opsins. The other two duplications separate the C- plus Go/RGR-opsins from the C-opsins, and the C- from the Go/RGR-opsins, respectively. The first of the two deletions affected the Bilateria that loose the Group 3 opsins. The second deletion affected Cnidaria that loose their Go/RGR opsin paralog. **(C)** The phylogeny of (10). This phylogeny implies that the Cnidopsins are the Cnidarian orthologue of the bilaterian opsins, and can be explained with two duplications in the stem bilaterian lineage only. The first of these duplications separated the C-opsins from the R plus Go/RGR lineage. The second separated the R-opsins from the Go/RGR-opsins. **(D)** The phylogeny of (11). This phylogeny can be explained with two

duplications and one or two deletions. The first duplication separated the C-opsins from the R plus Go/RGR lineage and happened in the stem eumetazoan lineage. The second duplication separated the R-opsins from the Go/RGR-opsins. The two deletions happened in the Cnidarian lineage and caused the loss of the R and Go/RGR paralogues. If the duplication separating the R-opsins from the Go/RGR opsins happened in the stem bilaterian lineage then only one deletion (of the R-opsin plus Go/RGR-opsin orthologue) happened in the cnidarian lineage. Note reference numbers point to the SI reference list (supplementary references) not to the main text reference list.

**Figure Supplementary 2. (A)** A plot of the difference ( $\Delta$ -abs), for each substitution in Table S2, between the GTR-O&O and WAG global exchange rates. A value of zero means that the rate is the same in both matrices. A positive value means that the GTR-O&O global exchange rate is higher than the WAG global exchange rate. A negative value means that the GTR-O&O global exchange rate is lower than the WAG global exchange rate. **(B)** A plot of the difference ( $\Delta$ -abs), for each substitution in Table S2, between the GTR-O&O and mtRev global exchange rates. A value of zero means that the rate is the same in both matrices. A positive value means that the GTR-O&O global exchange rate is higher than the mtRev global exchange rate. A negative value means that the GTR-O&O global exchange rate is lower than the mtRev global exchange rate. On the X-axis: amino acid substitutions (ordered with reference to their  $\Delta$ -abs – from smaller to big). On the Y-axis  $\Delta$ -abs values.

**Figure Supplementary 3.** The unrooted Bayesian phylogeny of the opsin family (obtained using a GTR +  $\Gamma$  model). Groups in this tree are coloured as in Fig 1a. Support values are posterior probabilities. See main text and supplementary methods for details.

**Figure Supplementary 4.** The rooted Bayesian phylogeny of the G&OM dataset obtained using a GTR +  $\Gamma$  model. Sequences from *Amphimedon* and *Oscarella* are coloured in light blue. All other relevant sequences in this tree are coloured as in Fig 1b. Support values are posterior probabilities. See main text and supplementary methods for details.

**Figure Supplementary 5.** The rooted Bayesian phylogeny of the O&O dataset obtained using a GTR +  $\Gamma$  model. Groups in this tree are coloured as in Fig 1c. Support values are posterior probabilities. See main text and supplementary methods for details.

**Figure Supplementary 6.** The Maximum likelihood phylogeny of the O&O dataset obtained using a LG +  $\Gamma$  model. 108 bootstrap replicates were performed. Groups in this tree are coloured as in Fig 1c.



**Figure Supplementary 7.** Logos representing the results of the Bayesian ancestral character state reconstructions for the RBD. **(A)** The RBD of the LOCA. **(B)** The RBD of the LOCNA. Dimensions of the letters in the logos represent the posterior probability of observing a given amino acid at that alignment position. Ancestral character state reconstruction was performed under GTR +  $\Gamma$  on the O&O data set. In red is the position 296.

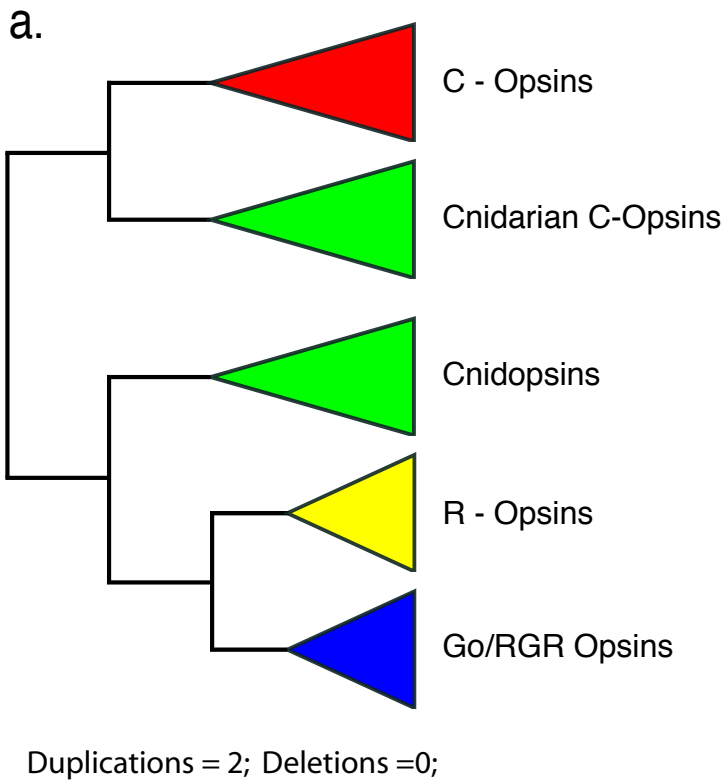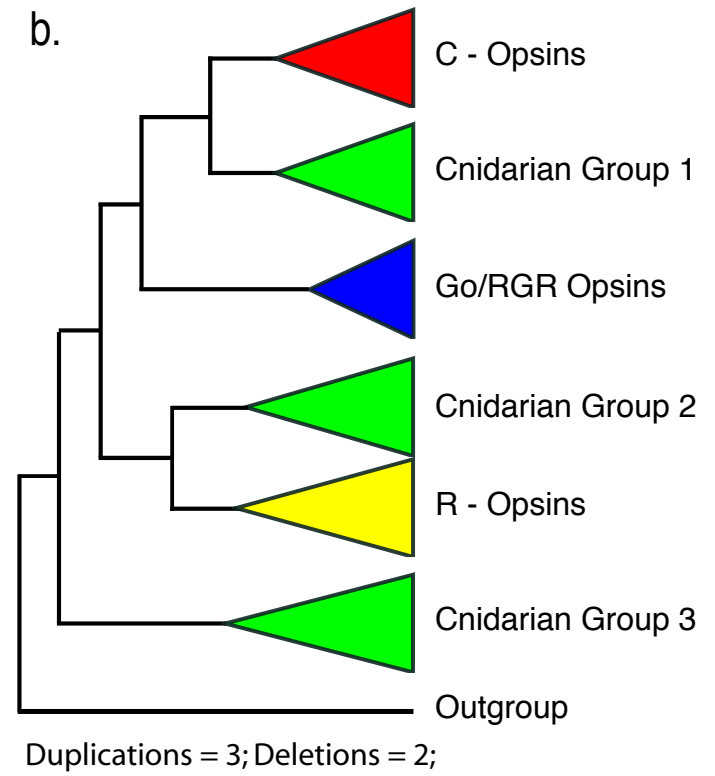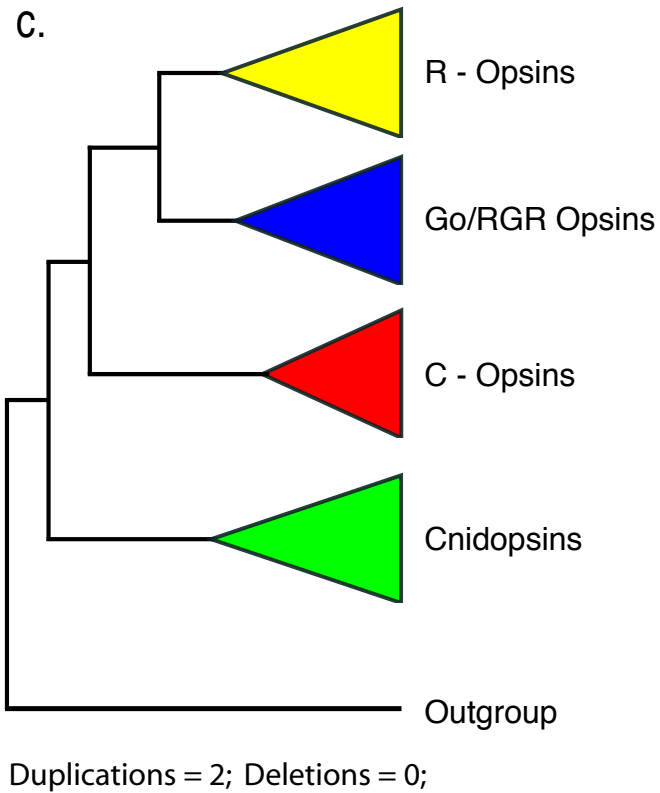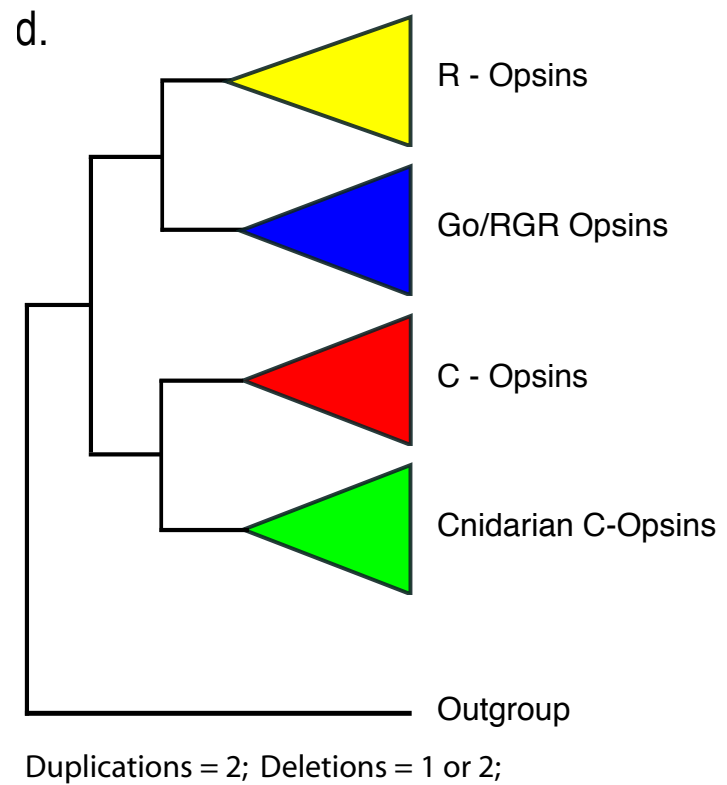

(A)

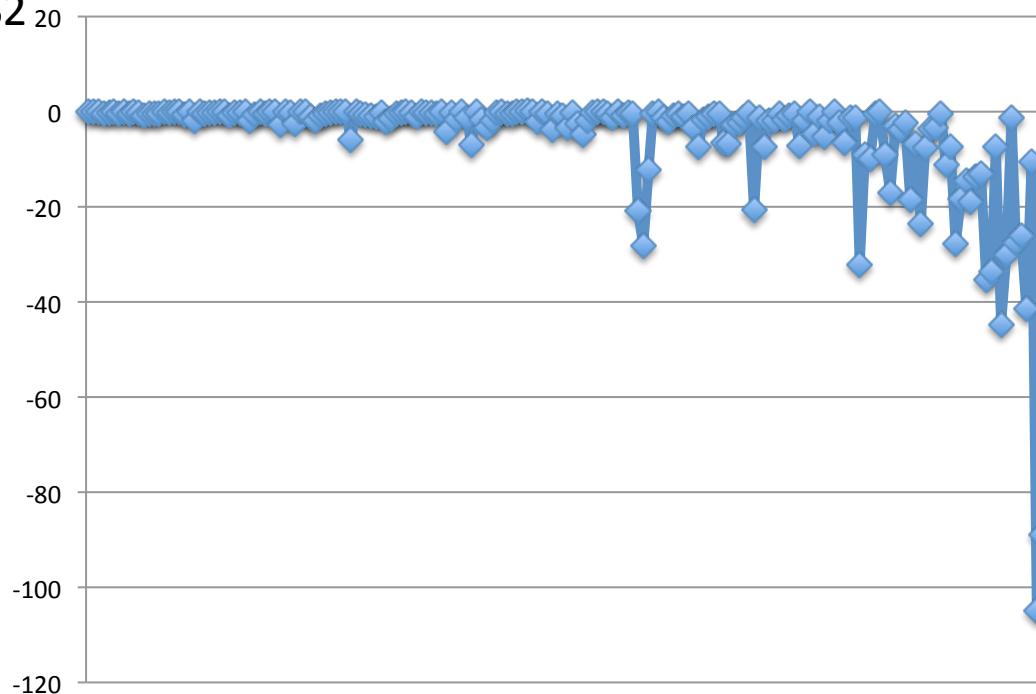

(B)

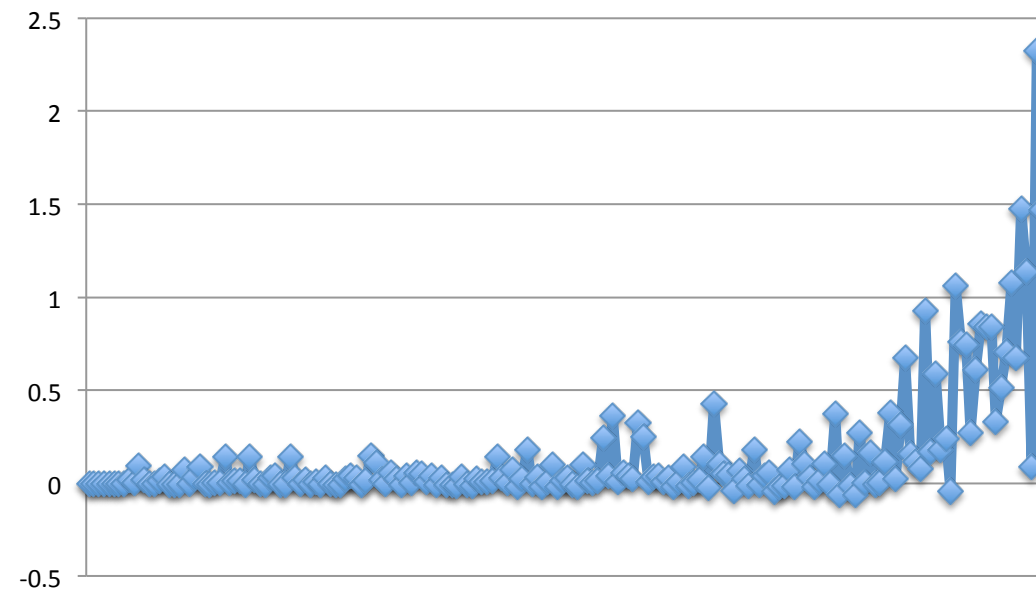



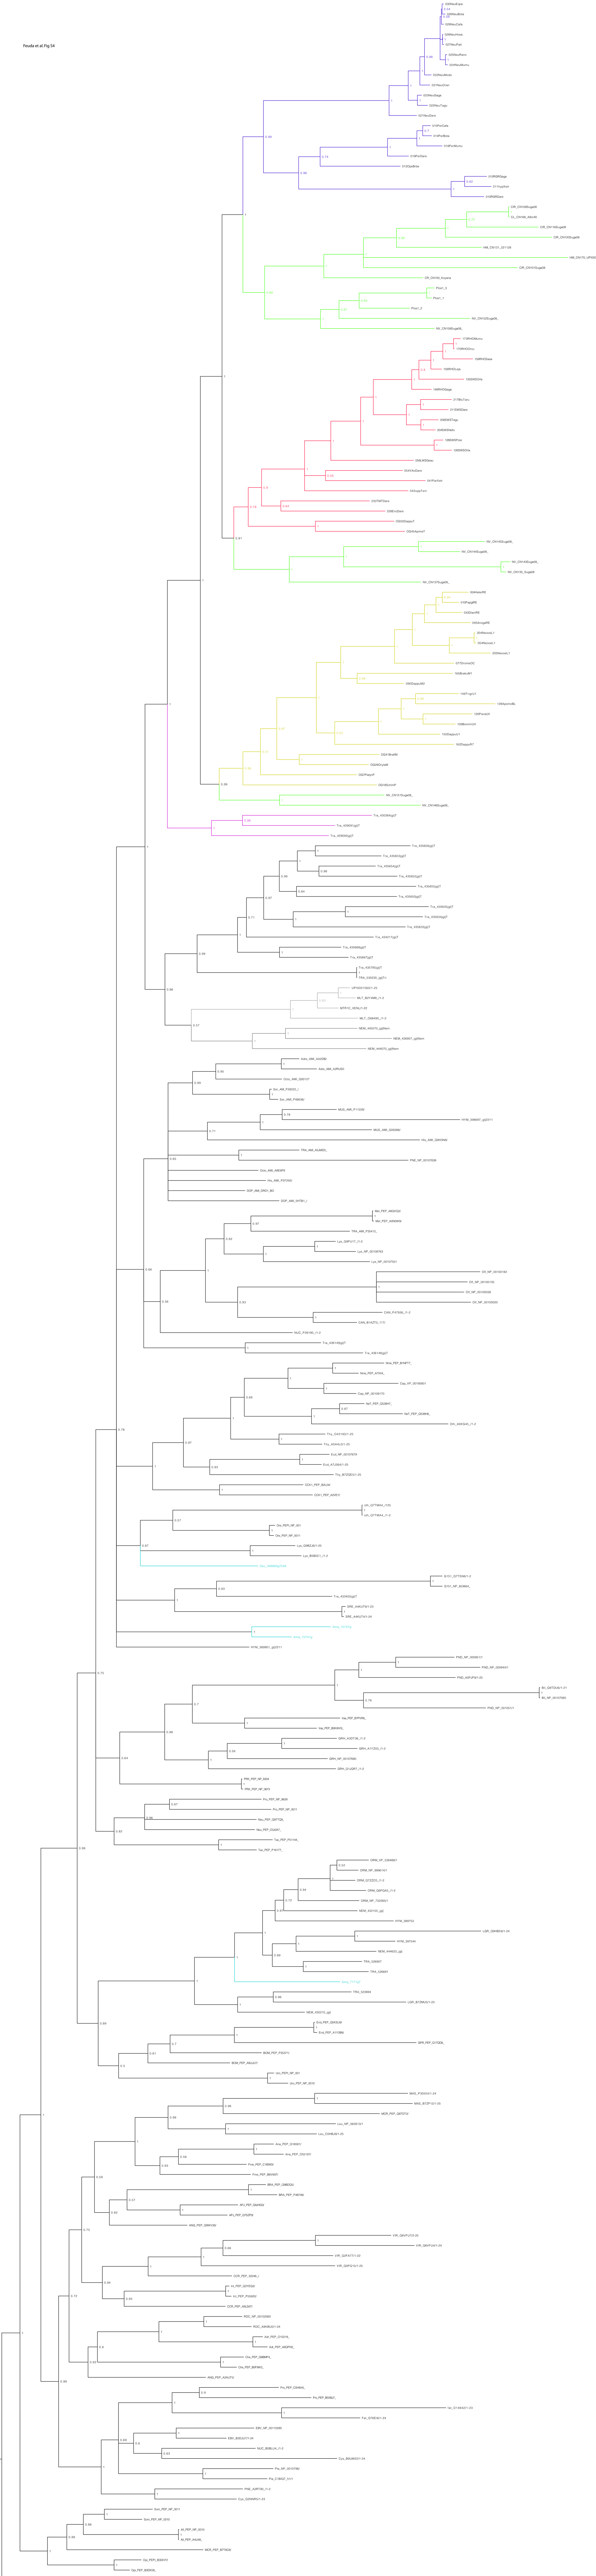



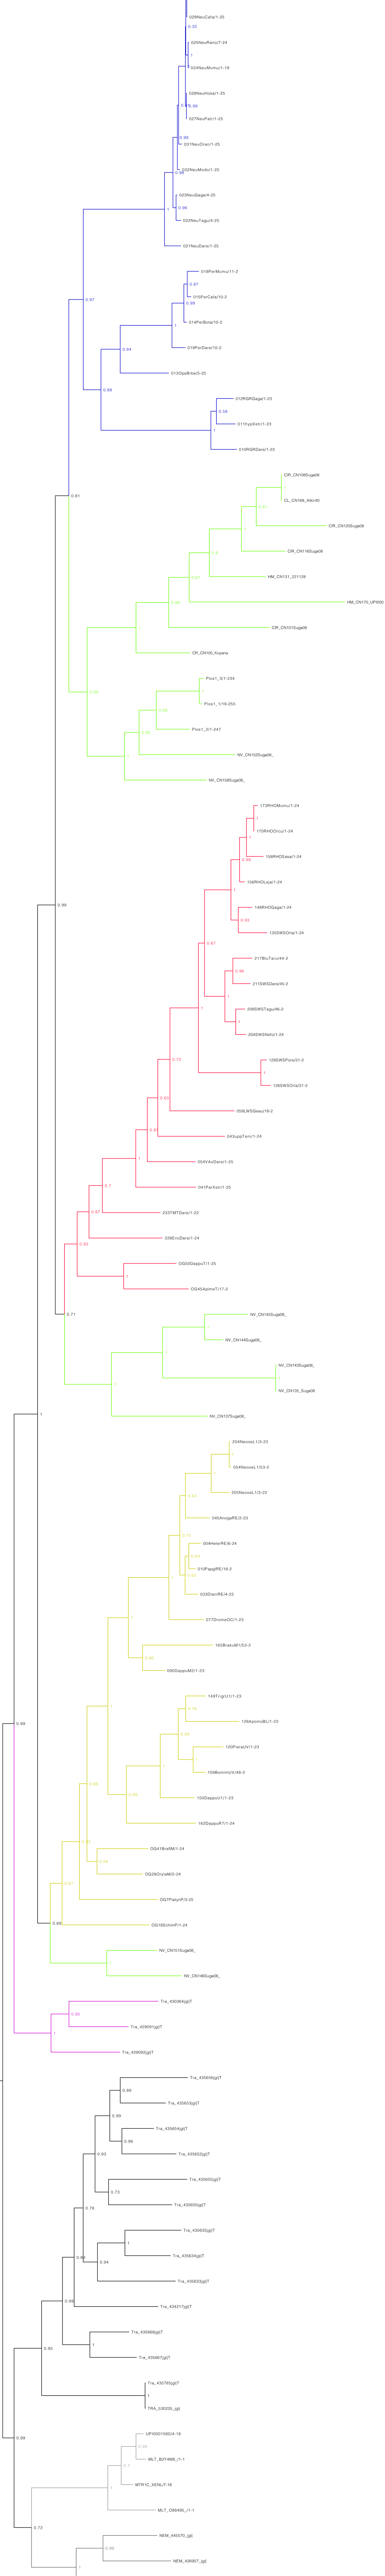

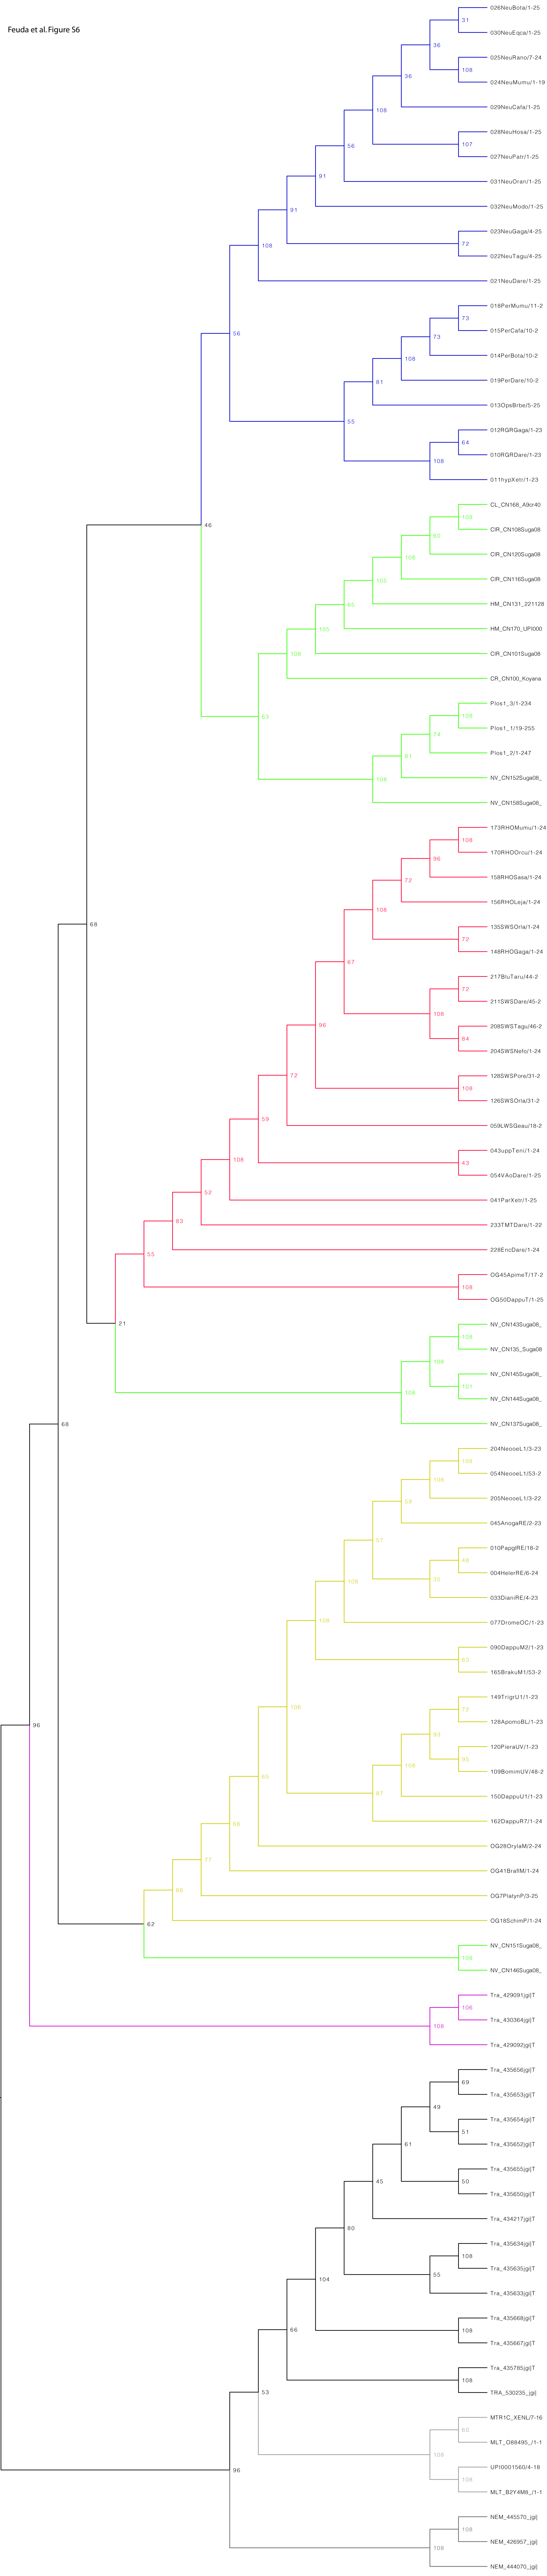

A



Word cloud A features the following words: VATELANANSAVNPITY, ITAY, ASSY, LAM, M, K, N, S, A, V, F, N, P, I, I, Y. The letters 'M', 'K', and 'N' are highlighted in red.

B



Word cloud B features the following words: ITTELANASSAYNPITY, PAW, VAS, SY, M, LAM, K, N, S, A, V, F, N, P, I, I, Y. The letters 'M', 'K', and 'N' are highlighted in red.
